# Supplementary material for: Metal-involved C⋯dz2-PtIItetrel bonding as a principal component of the stacking interaction between arenes and the platinum(ii) square-plane
Source: Royal Society of Chemistry journal article supplement (doi:10.1039/d3qi00555k), 2023-01-01
Supplement: d3qi00555k1.pdf [file d3qi00555k1.pdf]

## **Metal-involving $C \cdots d_z^2$ -Pt<sup>II</sup> Tetrel Bonding as a Principal Component of Stacking Interaction between Arenes and the Platinum(II) Square-plane**

Eugene A. Katlenok,\*<sup>1</sup> Maxim L. Kuznetsov,<sup>2</sup> Anton V. Cherkasov<sup>3</sup>, Dmitry M. Kryukov,<sup>1</sup>  
Nadezhda A. Bokach,<sup>1</sup> Vadim Yu. Kukushkin\*<sup>1,4</sup>

<sup>1</sup>*Institute of Chemistry, Saint Petersburg State University, Universitetskaya Nab. 7/9, 199034 Saint Petersburg, Russian Federation; e-mail: [v.kukushkin@spbu.ru](mailto:v.kukushkin@spbu.ru)*

<sup>2</sup>*Centro de Química Estrutural, Institute of Molecular Sciences, Departamento de Engenharia Química, Instituto Superior Técnico, Universidade de Lisboa, Av. Rovisco Pais, 1049-001 Lisboa, Portugal*

<sup>3</sup>*G. A. Razuvaev Institute of Organometallic Chemistry of Russian Academy of Sciences, Tropinina Str. 49, 603950 Nizhny Novgorod, Russian Federation*

<sup>4</sup>*Laboratory of Crystal Engineering of Functional Materials, South Ural State University, 76, Lenin Av., 454080 Chelyabinsk, Russian Federation*

## Content

|                                                                            |    |
|----------------------------------------------------------------------------|----|
| 1. Crystal data and structure refinement .....                             | 3  |
| 2. CSD search for $\pi$ -hole···M contacts .....                           | 6  |
| 3. Computational details .....                                             | 32 |
| 3.1. Geometry. ....                                                        | 32 |
| 3.2. QTAIM .....                                                           | 34 |
| 3.3 ETS-NOCV-CDF .....                                                     | 35 |
| 4. Cartesian coordinates for the studied molecules .....                   | 38 |
| Cartesian coordinate for [1·OFA] (in Å) .....                              | 38 |
| Cartesian coordinate for [1·OFA·1] (in Å) .....                            | 41 |
| Cartesian coordinate for [1·C <sub>6</sub> F <sub>6</sub> ] (in Å) .....   | 45 |
| Cartesian coordinate for [1·C <sub>6</sub> F <sub>6</sub> ·1] (in Å) ..... | 47 |
| Cartesian coordinate for [2·C <sub>6</sub> F <sub>6</sub> ] (in Å) .....   | 51 |
| Cartesian coordinate for [2·C <sub>6</sub> F <sub>6</sub> ·2] (in Å) ..... | 52 |

# 1. Crystal data and structure refinement

**Table S1.** Crystal data and structure refinement for **1·(OFA)<sub>2</sub>**, **1·C<sub>6</sub>F<sub>6</sub>**, and **2·C<sub>6</sub>F<sub>6</sub>**.

| Identification code                         | <b>1·(OFA)<sub>2</sub></b>                                                                                  | <b>1·C<sub>6</sub>F<sub>6</sub></b>                                                          | <b>2·C<sub>6</sub>F<sub>6</sub></b>                                                          |
|---------------------------------------------|-------------------------------------------------------------------------------------------------------------|----------------------------------------------------------------------------------------------|----------------------------------------------------------------------------------------------|
| Empirical formula                           | C <sub>58</sub> H <sub>28</sub> F <sub>8</sub> N <sub>4</sub> O <sub>2</sub> Pt <sub>2</sub> S <sub>4</sub> | C <sub>50</sub> H <sub>28</sub> F <sub>6</sub> N <sub>4</sub> Pt <sub>2</sub> S <sub>4</sub> | C <sub>42</sub> H <sub>24</sub> F <sub>6</sub> N <sub>4</sub> Pt <sub>2</sub> S <sub>4</sub> |
| Formula weight                              | 1483.26                                                                                                     | 1317.18                                                                                      | 1217.07                                                                                      |
| Temperature/K                               | 100(2)                                                                                                      | 100.0(5)                                                                                     | 100.00(10)                                                                                   |
| Crystal system                              | triclinic                                                                                                   | monoclinic                                                                                   | monoclinic                                                                                   |
| Space group                                 | P-1                                                                                                         | C2/c                                                                                         | P2/n                                                                                         |
| a/Å                                         | 10.7456(2)                                                                                                  | 10.02350(10)                                                                                 | 10.0312(2)                                                                                   |
| b/Å                                         | 14.0684(2)                                                                                                  | 29.0365(4)                                                                                   | 11.5989(2)                                                                                   |
| c/Å                                         | 16.9039(3)                                                                                                  | 15.6254(2)                                                                                   | 16.5342(3)                                                                                   |
| α/°                                         | 87.4668(13)                                                                                                 | 90                                                                                           | 90                                                                                           |
| β/°                                         | 83.8451(15)                                                                                                 | 105.9290(10)                                                                                 | 98.669(2)                                                                                    |
| γ/°                                         | 70.6288(18)                                                                                                 | 90                                                                                           | 90                                                                                           |
| Volume/Å <sup>3</sup>                       | 2396.78(8)                                                                                                  | 4373.11(10)                                                                                  | 1901.79(6)                                                                                   |
| Z                                           | 2                                                                                                           | 4                                                                                            | 2                                                                                            |
| ρ <sub>calc</sub> /cm <sup>3</sup>          | 2.055                                                                                                       | 2.001                                                                                        | 2.125                                                                                        |
| μ/mm <sup>-1</sup>                          | 13.117                                                                                                      | 14.166                                                                                       | 16.211                                                                                       |
| F(000)                                      | 1424.0                                                                                                      | 2520.0                                                                                       | 1156.0                                                                                       |
| Crystal size/mm <sup>3</sup>                | 0.17 × 0.14 × 0.11                                                                                          | 0.07 × 0.06 × 0.03                                                                           | 0.15 × 0.12 × 0.1                                                                            |
| Radiation                                   | CuKα (λ = 1.54184)                                                                                          | Cu Kα (λ = 1.54184)                                                                          | Cu Kα (λ = 1.54184)                                                                          |
| 2θ range for data collection/°              | 5.258 to 133.202                                                                                            | 6.088 to 141.402                                                                             | 7.622 to 139.996                                                                             |
| Index ranges                                | -12 ≤ h ≤ 12, -16 ≤ k ≤ 11, -20 ≤ l ≤ 19                                                                    | -12 ≤ h ≤ 11, -35 ≤ k ≤ 33, -18 ≤ l ≤ 19                                                     | -12 ≤ h ≤ 12, -9 ≤ k ≤ 14, -20 ≤ l ≤ 20                                                      |
| Reflections collected                       | 16859                                                                                                       | 14582                                                                                        | 15928                                                                                        |
| Independent reflections                     | 16859 [R <sub>int</sub> = n/a, R <sub>sigma</sub> = 0.0209]                                                 | 4181 [R <sub>int</sub> = 0.0384, R <sub>sigma</sub> = 0.0307]                                | 3607 [R <sub>int</sub> = 0.0394, R <sub>sigma</sub> = 0.0333]                                |
| Data/restraints/parameters                  | 16859/0/704                                                                                                 | 4181/180/342                                                                                 | 3607/0/252                                                                                   |
| Goodness-of-fit on F <sup>2</sup>           | 1.015                                                                                                       | 1.034                                                                                        | 1.035                                                                                        |
| Final R indexes [I ≥ 2σ(I)]                 | R <sub>1</sub> = 0.0540, wR <sub>2</sub> = 0.1545                                                           | R <sub>1</sub> = 0.0275, wR <sub>2</sub> = 0.0719                                            | R <sub>1</sub> = 0.0298, wR <sub>2</sub> = 0.0750                                            |
| Final R indexes [all data]                  | R <sub>1</sub> = 0.0626, wR <sub>2</sub> = 0.1651                                                           | R <sub>1</sub> = 0.0288, wR <sub>2</sub> = 0.0729                                            | R <sub>1</sub> = 0.0314, wR <sub>2</sub> = 0.0762                                            |
| Largest diff. peak/hole / e Å <sup>-3</sup> | 2.86/-1.51                                                                                                  | 2.09/-0.81                                                                                   | 2.54/-1.24                                                                                   |
| CCDC Nos                                    | 2245750                                                                                                     | 2245749                                                                                      | 2245751                                                                                      |

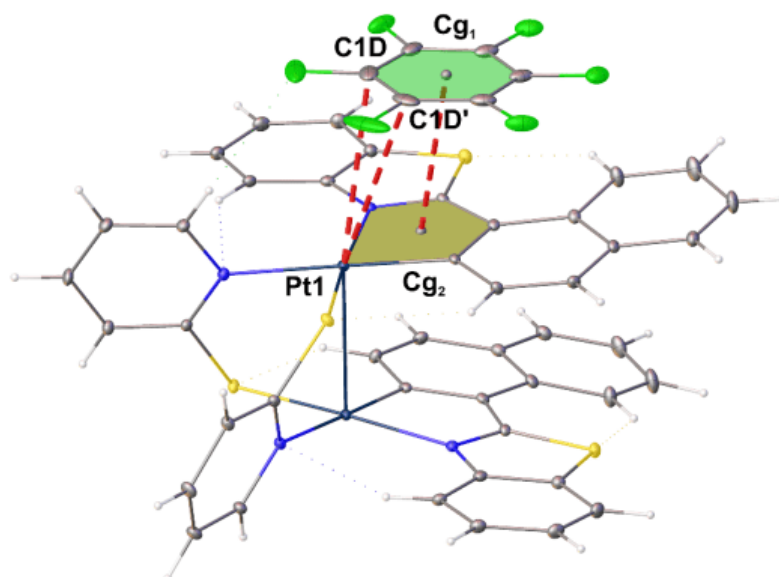

**Figure S1.** A fragment of the crystal structure of  $1 \cdot \text{C}_6\text{F}_6$ . Short contacts are given by dotted lines and thermal ellipsoids are shown at the 50% probability level

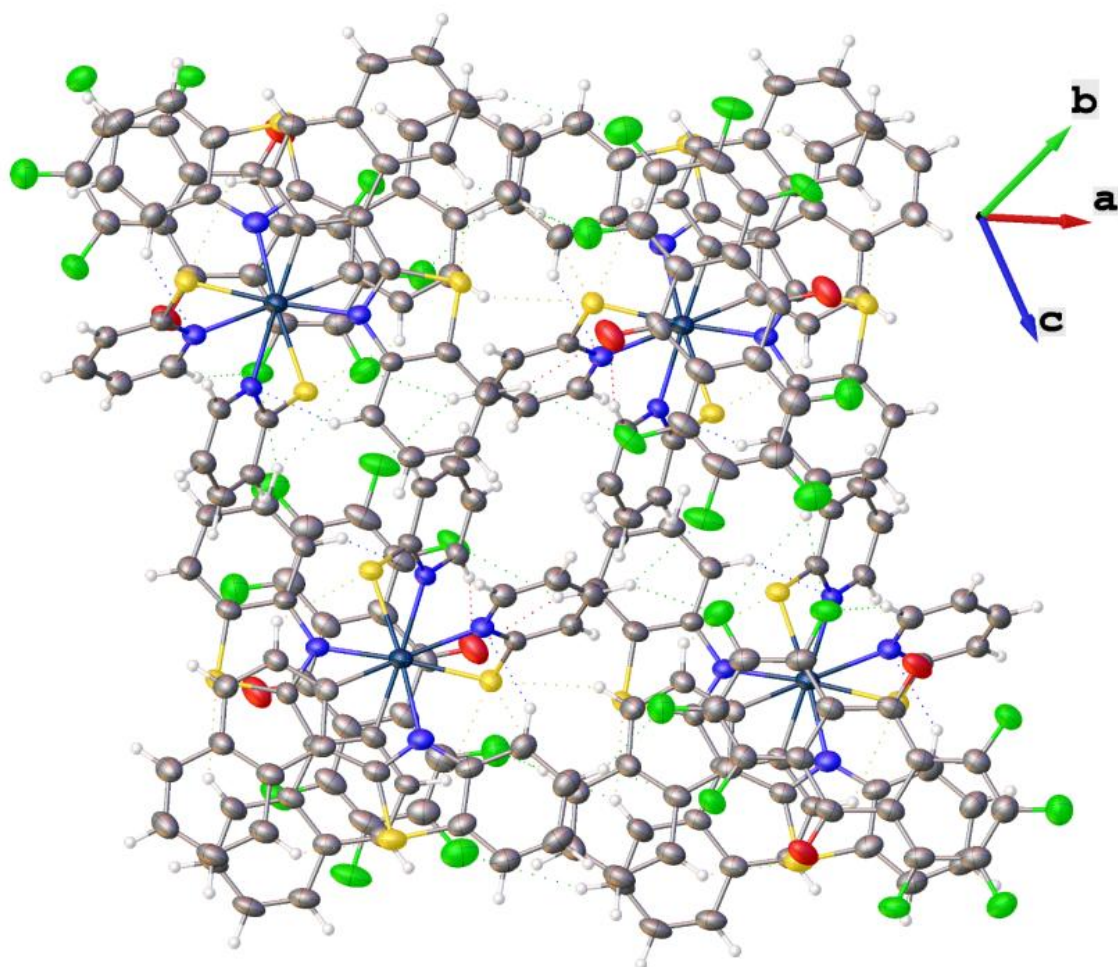

**Figure S2.** A fragment of the crystal packing of  $1 \cdot (\text{OFA})_2$ .

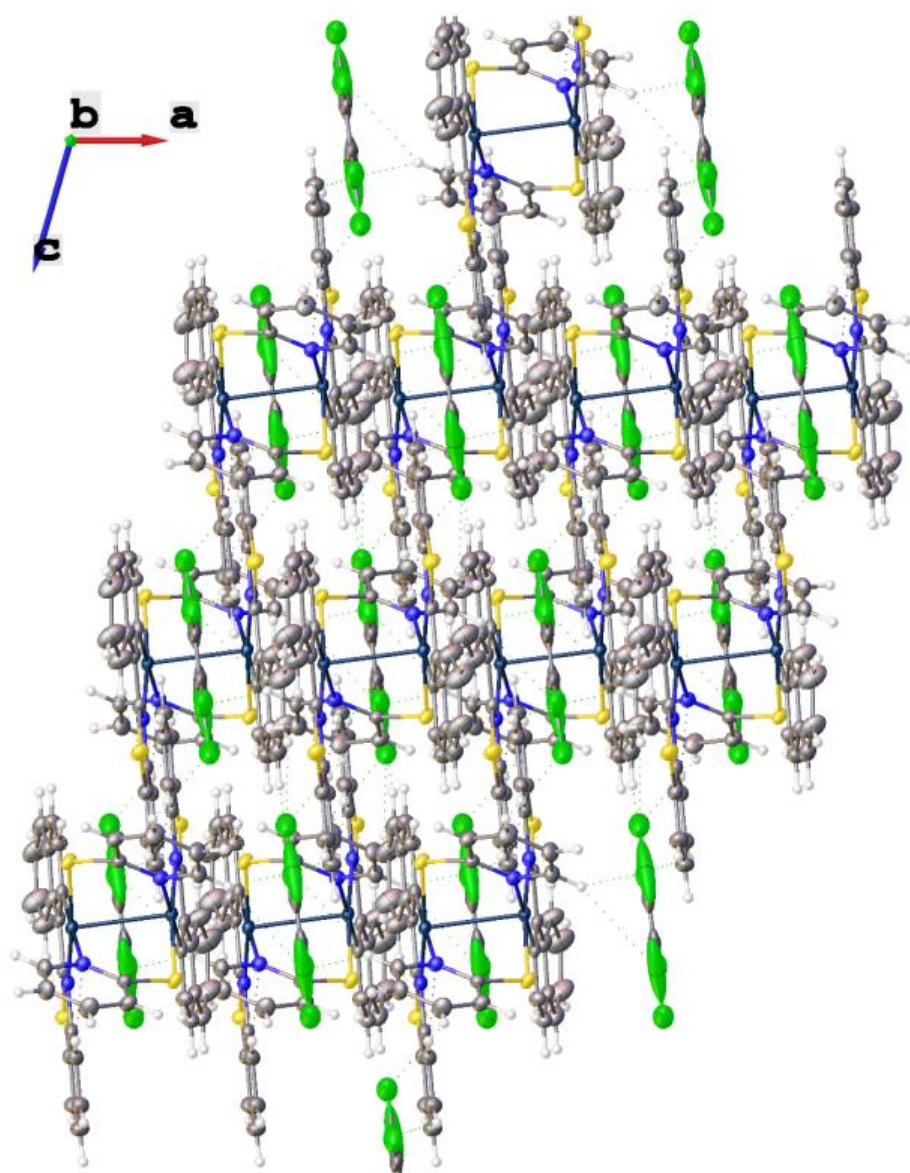

**Figure S3.** A fragment of the crystal packing of  $1 \cdot \text{C}_6\text{F}_6$ .

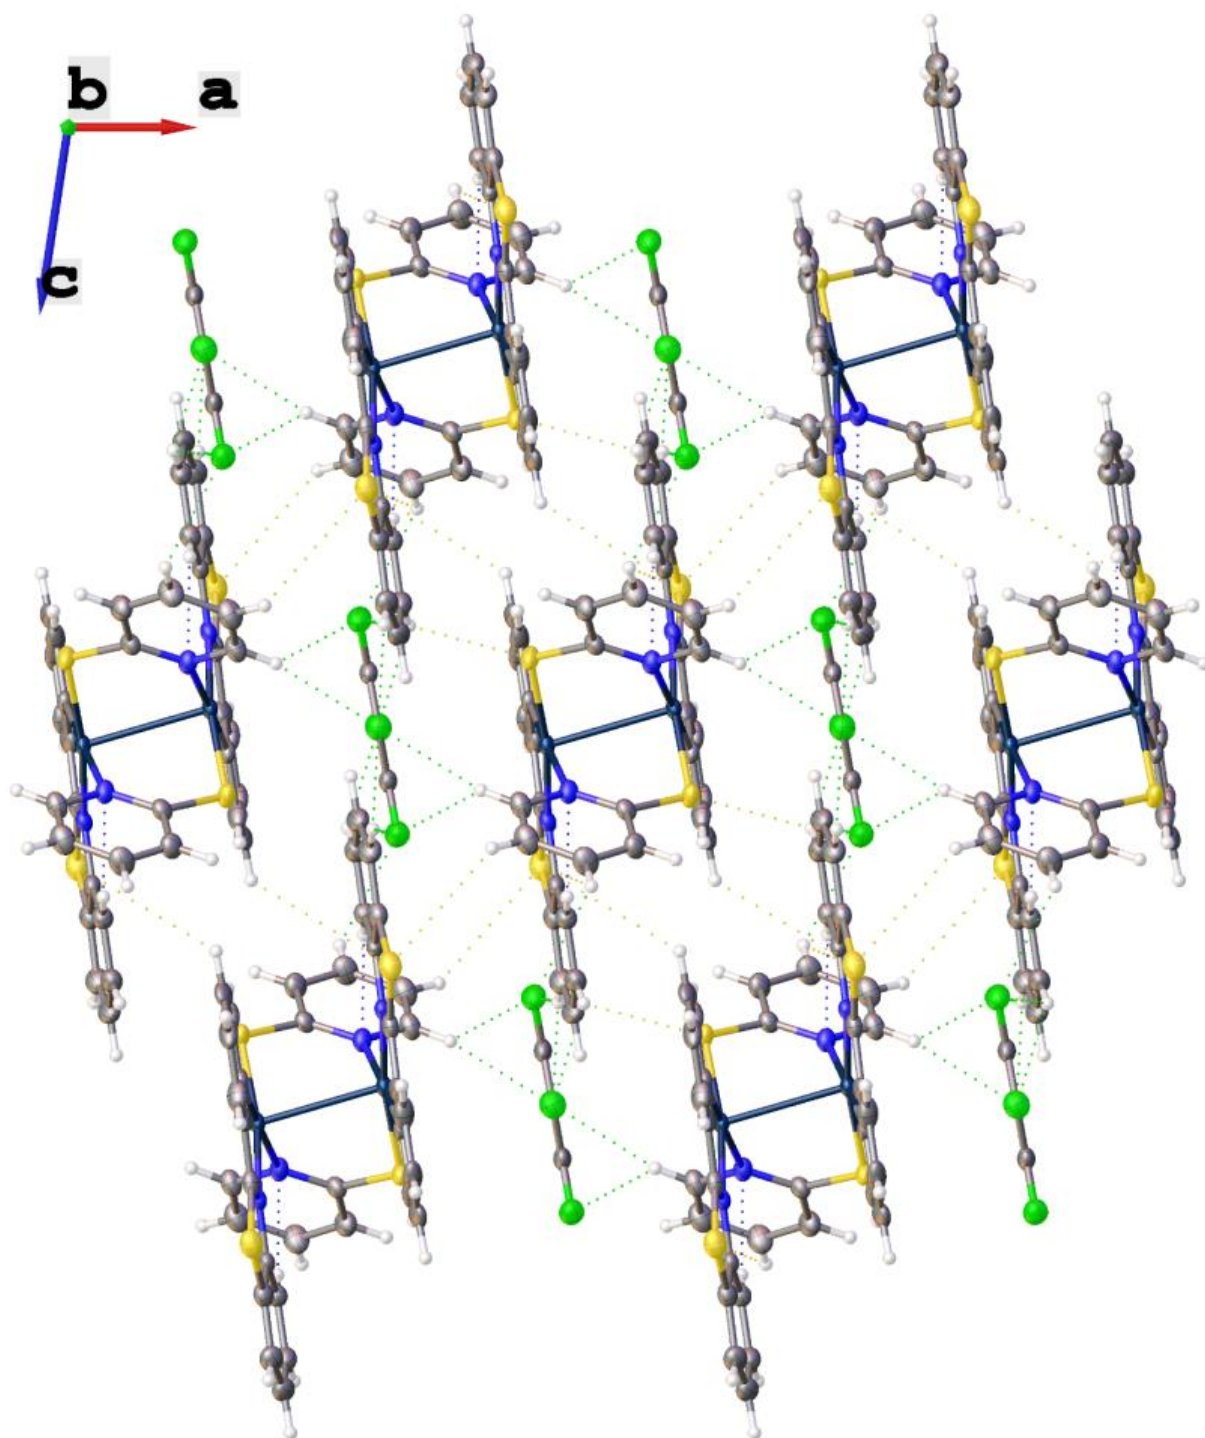

**Figure S4.** A fragment of the crystal packing of  $2 \cdot \text{C}_6\text{F}_6$ .

## 2. CSD search for $\pi$ -hole···M contacts

We analyzed the Cambridge Structural Database<sup>1</sup> (CSD version 5.43 updates March, 2022; search and processing was carried out in the program ConQuest version 2022.2.0) (Table S2) to demonstrate the occurrence of short contacts between a  $\pi$ -hole and a metal ion. The search was



carried out based on the following three geometrical parameters: (i)  $Cg \cdots M$  distances were set in the range from 3.0 to 4.5 Å (where Cg is centroid of an aromatic ring; M is a transition metal in a square-planar environment), (ii) the angle between the normal of the aromatic ring varied from 0 to 45°; (iii) only structures with halogen substituents at an aromatic ring were considered. Notably, C(isocyanide)  $\cdots M$  contacts can also be considered as  $\pi$ -hole  $\cdots M$  interaction and we found several examples of relevant contacts in CSD (**Table S2**, group 3). We did consider not include these results because of the difference of C(isocyanide)  $\cdots M$  contacts from contacts involving aromatic ring  $\pi$ -hole; the latter are closer to structures obtained in this work.

According to these criteria, we revealed 60 structures with  $\pi$ -hole  $\cdots M$  short contacts; they were divided into two groups. The first group consists of 33 structures (blue dots, **Figure S5** and **Table S2**, group 1) of cocrystals formed on cocrystallization of perfluoro(het)arenes (including substituted fluorinated derivatives) with mononuclear platinum(II), palladium(II), nickel(II), copper(II), and gold(I) complexes. In this group, typical  $\pi$ -hole  $\cdots M$  separations are of 3.2–4.2 Å with the angles in the range 0–35°.

The second group (27 structures, black dots, **Figure S2**) includes contacts in the crystal structures of metal complexes and metalloporphyrins bearing perfluoroaromatic ligands.<sup>2</sup> These contacts are most likely induced by crystal packing effects as follows from more diffuse character of the scatter in bond lengths and angles (3.3–4.6 Å and 6–44°). All identified contacts include only mononuclear Pt<sup>II</sup>, Pd<sup>II</sup>, Ni<sup>II</sup>, and Au<sup>III</sup> complexes, while binuclear (or higher) complexes functioning as acceptors of  $\pi$ -hole  $\cdots [M-M]$  interactions were not found.

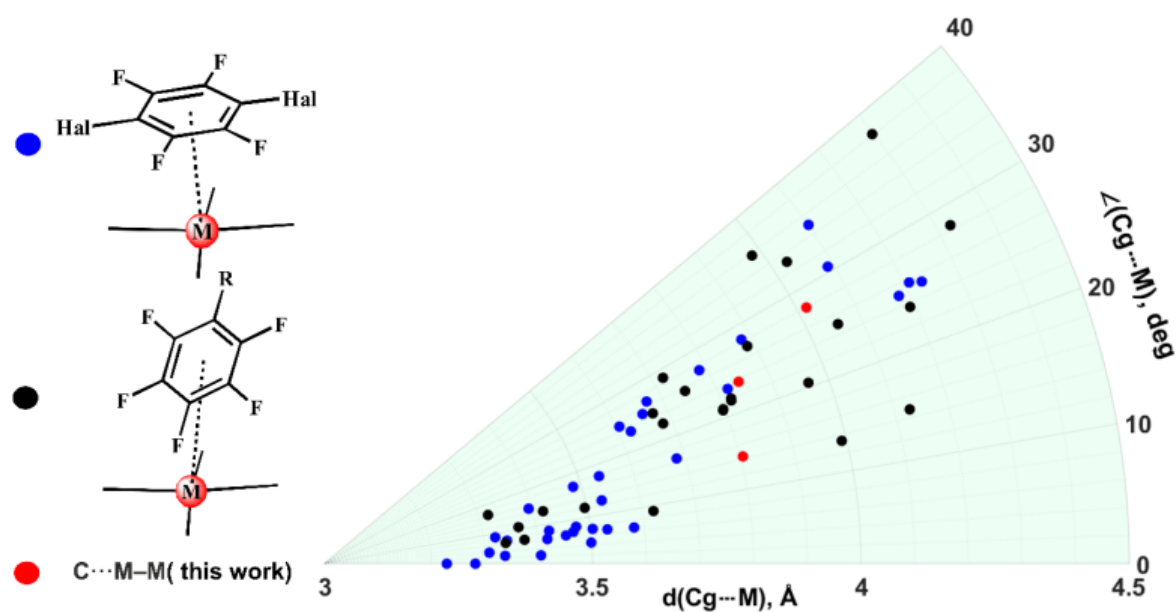

**Figure S5.** Angular distribution for intermolecular  $\pi$ -hole  $\cdots M$  contacts retrieved from the CSD. The distances were set as the range between 3.0 and 4.5 Å, while the angularity was set in the 0–

40° range.  $R$  factor  $\leq 6\%$ .



**Table S2.** Results of CSD search for  $\pi$ -hole $\cdots$ M contacts.

|                                                                                     | Refcode | d(C $\cdots$ M),<br>Å | d(Cg $\cdots$ M),<br>Å | $\Theta$ (Cg $\cdots$ M), $^\circ$ | d(C $\cdots$ M)/<br>$\Sigma$ AvdW | Type of<br>interaction                                                     | Ref          |
|-------------------------------------------------------------------------------------|---------|-----------------------|------------------------|------------------------------------|-----------------------------------|----------------------------------------------------------------------------|--------------|
| Group 1 (X-C $\cdots$ M), X= Hal                                                    |         |                       |                        |                                    |                                   |                                                                            |              |
| M = Pt                                                                              |         |                       |                        |                                    |                                   |                                                                            |              |
| 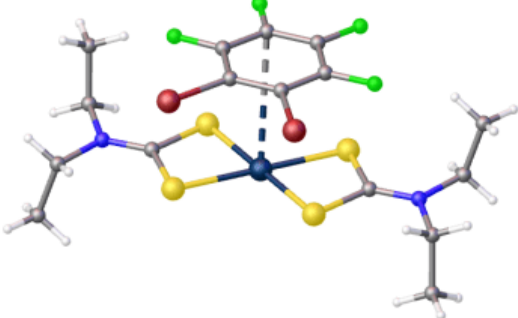   | FEBLAD  | 3.584(5)              | 3.4677(16)             | 7.30                               | 0.883                             | Classified<br>as $\pi$ -<br>hole $\cdots$ Pt <sup>II</sup><br>interaction  | <sup>3</sup> |
|    | GEMWUS  | 3.543(11)             | 3.418                  | 6.29                               | 0.873                             | Classified<br>by as $\pi$ - $\pi$<br>stacking                              | <sup>4</sup> |
|  | JUXBIQ  | 3.3418(16)            | 3.622                  | 23.347                             | 0.823                             | Classified<br>as $\pi$ -<br>hole $\cdots$ Pt <sup>II</sup><br>interactions | <sup>5</sup> |

|                                                                                    |        |            |       |        |       |                                      |   |
|------------------------------------------------------------------------------------|--------|------------|-------|--------|-------|--------------------------------------|---|
| 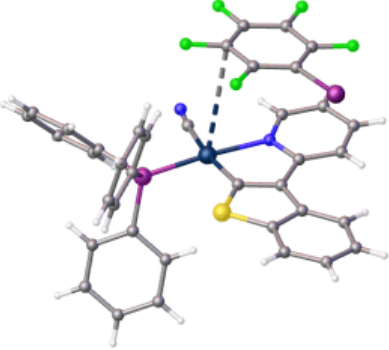  | MIRHIH | 3.8456(14) | 4.209 | 25.674 | 0.947 | Classified as $\pi$ - $\pi$ stacking | 6 |
|   | MIRHUT | 3.6930(15) | 4.089 | 30.529 | 0.910 | Classified as $\pi$ - $\pi$ stacking | 6 |
|  | NUQTEA | 3.863(3)   | 4.231 | 25.273 | 0.951 | Classified as $\pi$ - $\pi$ stacking | 7 |

|                                                                                    |        |            |       |       |       |                                                                 |   |
|------------------------------------------------------------------------------------|--------|------------|-------|-------|-------|-----------------------------------------------------------------|---|
| 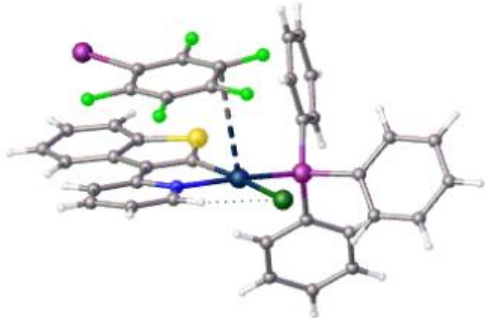  | NUQTIE | 3.8332(16) | 4.181 | 24.98 | 0.944 | Classified as $\pi$ - $\pi$ stacking                            | 7 |
|   | OJIXEK | 3.528(8)   | 4.101 | 34.97 | 0.869 | Classified as $\pi$ -interactions                               | 8 |
|  | PUNNIY | 3.405(3)   | 3.322 | 8.78  | 0.839 | Classified as $\pi$ -hole $\cdots$ Pt <sup>II</sup> interaction | 9 |

|                                                                                    |        |          |          |        |       |                                                                 |              |
|------------------------------------------------------------------------------------|--------|----------|----------|--------|-------|-----------------------------------------------------------------|--------------|
| 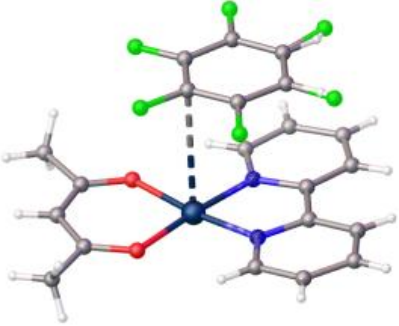  | PUNNUK | 3.347(5) | 3.655    | 25.171 | 0.824 | Classified as $\pi$ -hole $\cdots$ Pt <sup>II</sup> interaction | <sup>9</sup> |
|   | PUNPAS | 3.316(4) | 3.606    | 24.915 | 0.817 | Classified as $\pi$ -hole $\cdots$ Pt <sup>II</sup> interaction | <sup>9</sup> |
|  | PUNPEW | 3.576(9) | 3.343(5) | 7.18   | 0.881 | Classified as $\pi$ -hole $\cdots$ Pt <sup>II</sup> interaction | <sup>9</sup> |

|                                                                                     |        |          |             |        |       |                                                                 |               |
|-------------------------------------------------------------------------------------|--------|----------|-------------|--------|-------|-----------------------------------------------------------------|---------------|
| 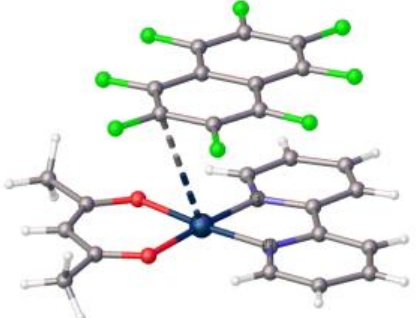   | PUNPIA | 3.563(4) | 3.3371(14)  | 2.50   | 0.878 | Classified as $\pi$ -hole $\cdots$ Pt <sup>II</sup> interaction | <sup>9</sup>  |
|    | RIRKOV | 3.329(5) | 3.394       | 15.075 | 0.820 | Classified as $\pi$ -hole $\cdots$ Pt <sup>II</sup> interaction | <sup>10</sup> |
|   | RIRMEN | 3.557(2) | 3.28125(15) | 0      | 0.876 | Classified as $\pi$ -hole $\cdots$ Pt <sup>II</sup> interaction | <sup>10</sup> |
|  | ULUZIN | 3.555(5) | 3.882       | 28.246 | 0.876 | Classified as $\pi$ -hole $\cdots$ Pt <sup>II</sup> interaction | <sup>11</sup> |

|                                                                                    |        |          |       |        |       |                                                                 |               |
|------------------------------------------------------------------------------------|--------|----------|-------|--------|-------|-----------------------------------------------------------------|---------------|
| 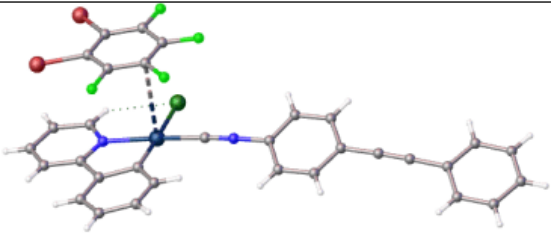  | ULUZOT | 3.394(7) | 3.537 | 17.671 | 0.836 | Classified as $\pi$ -hole $\cdots$ Pt <sup>II</sup> interaction | <sup>11</sup> |
|   | ULUZUZ | 3.489(5) | 3.53  | 12.847 | 0.859 | Classified as $\pi$ -hole $\cdots$ Pt <sup>II</sup> interaction | <sup>11</sup> |
|   | UMACAP | 3.456(5) | 3.786 | 27.289 | 0.851 | Classified as $\pi$ -hole $\cdots$ Pt <sup>II</sup> interaction | <sup>11</sup> |
| M = Pd                                                                             |        |          |       |        |       |                                                                 |               |
|  | CANZEA | 3.56(1)  | 3.474 | 8.35   | 0.908 | Classified as $\pi$ -hole $\cdots$ Pd <sup>II</sup> interaction | <sup>12</sup> |

|                                                                                    |        |          |       |       |       |                                                                 |    |
|------------------------------------------------------------------------------------|--------|----------|-------|-------|-------|-----------------------------------------------------------------|----|
| 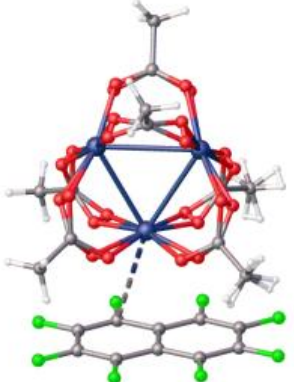  | CANZOK | 3.577(3) | 3.485 | 17.17 | 0.913 | Classified as $\pi$ -hole $\cdots$ Pd <sup>II</sup> interaction | 12 |
|   | CAPBAA | 3.507(3) | 3.308 | 3.83  | 0.895 | Classified as $\pi$ -hole $\cdots$ Pd <sup>II</sup> interaction | 12 |
|  | CAPBEE | 3.641(4) | 3.404 | 2.21  | 0.929 | Classified as $\pi$ -hole $\cdots$ Pd <sup>II</sup> interaction | 12 |



|                                                                                    |        |           |            |       |       |                                                                 |               |
|------------------------------------------------------------------------------------|--------|-----------|------------|-------|-------|-----------------------------------------------------------------|---------------|
| 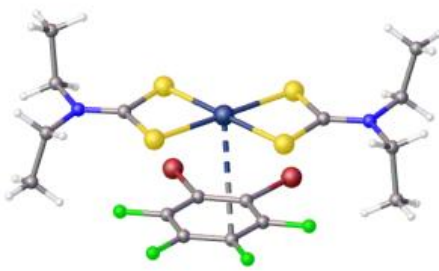  | FEBKUW | 3.581(4)  | 3.4527(13) | 6.66  | 0.914 | Classified as $\pi$ -hole $\cdots$ Pd <sup>II</sup> interaction | <sup>3</sup>  |
|   | RIRMAJ | 3.5119(8) | 3.228(15)  | 0     | 0.896 | Classified as $\pi$ -hole $\cdots$ Pd <sup>II</sup> interaction | <sup>10</sup> |
|  | RIRMIR | 3.423(2)  | 3.32670(7) | 8.349 | 0.873 | Classified as $\pi$ -hole $\cdots$ Pd <sup>II</sup> interaction | <sup>10</sup> |
| M = Au                                                                             |        |           |            |       |       |                                                                 |               |

|                                                                                    |        |           |          |       |       |                                             |               |
|------------------------------------------------------------------------------------|--------|-----------|----------|-------|-------|---------------------------------------------|---------------|
| 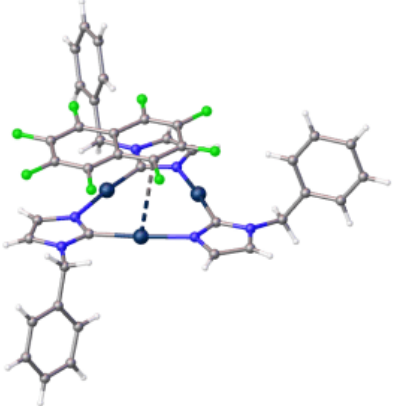  | EKUJAW | 3.364(9)  | 3.672    | 26.71 | 0.822 | Classified as $\pi$ -acid–base interactions | <sup>13</sup> |
|   | VOQCAF | 3.545(8)  | 3.685    | 16.62 | 0.867 | Classified as $\pi$ -acid–base interactions | <sup>14</sup> |
|  | XASNOV | 3.516(12) | 3.819(5) | 23.42 | 0.860 | Classified as $\pi$ -interactions           | <sup>15</sup> |
| M = Ni                                                                             |        |           |          |       |       |                                             |               |

|                                                                                    |        |          |            |       |       |                                                                 |               |
|------------------------------------------------------------------------------------|--------|----------|------------|-------|-------|-----------------------------------------------------------------|---------------|
| 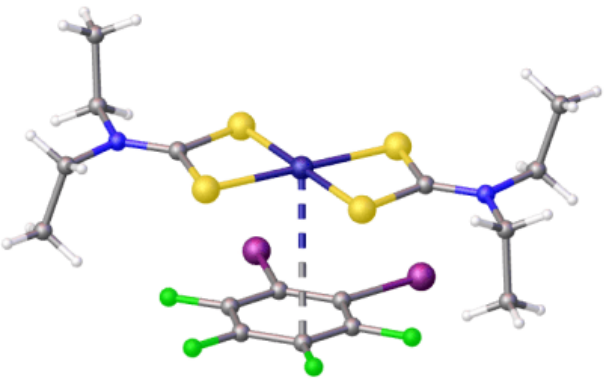  | FEBKIK | 3.668(3) | 3.4988(10) | 4.52  | 0.880 | Classified as $\pi$ -hole $\cdots$ Ni <sup>II</sup> interaction | <sup>3</sup>  |
|   | FEBKOQ | 3.576(3) | 3.4532(10) | 6.67  | 0.858 | Classified as $\pi$ -hole $\cdots$ Ni <sup>II</sup> interaction | <sup>3</sup>  |
|  | LAGHUA | 3.591(4) | 3.504      | 7.382 | 0.861 | This contact was not mentioned in the original article          | <sup>16</sup> |
| M = Cu                                                                             |        |          |            |       |       |                                                                 |               |

|                                                                                     |        |          |            |        |       |                                                        |    |
|-------------------------------------------------------------------------------------|--------|----------|------------|--------|-------|--------------------------------------------------------|----|
| 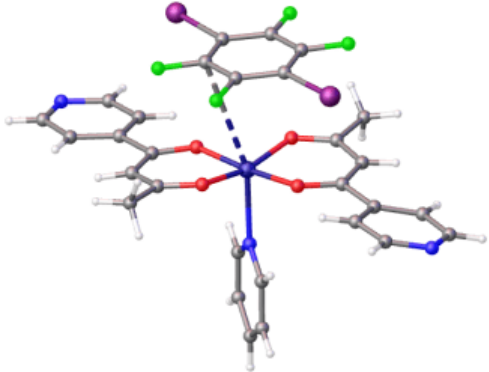   | PEHVEH | 3.632(3) | 3.5312(11) | 6.91   | 0.875 | Classified as $\pi$ -hole $\cdots$ Cu interaction      | 17 |
| Group 2 (F-C $\cdots$ M)                                                            |        |          |            |        |       |                                                        |    |
| M = Pt                                                                              |        |          |            |        |       |                                                        |    |
|    | ACUZUW | 3.930(2) | 4.1917(9)  | 23.66  | 0.968 | This contact was not mentioned in the original article | 18 |
|   | ADELED | 3.493(9) | 3.886      | 27.207 | 0.860 | This contact was not mentioned in the original article | 19 |
|  | AVEWAA | 3.399(3) | 3.368      | 10.65  | 0.837 | Classified as $\pi$ -stacking and Coulomb forces       | 20 |

|                                                                                    |        |          |          |        |       |                                                           |    |
|------------------------------------------------------------------------------------|--------|----------|----------|--------|-------|-----------------------------------------------------------|----|
| 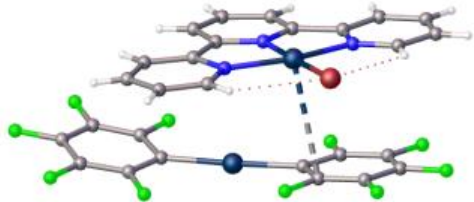  | AVEWEE | 3.435(4) | 3.419    | 13.492 | 0.846 | Classified as $\pi$ -stacking and Coulomb forces          | 20 |
|   | BACXEJ | 3.746(6) | 4.056(2) | 25.0   | 0.923 | These contacts were not mentioned in the original article | 21 |
|  | BARVEW | 3.56(1)  | 4.357    | 44.284 | 0.877 | This contact was not mentioned in the original article    | 2  |

|                                                                                    |        |          |           |        |       |                                                        |    |
|------------------------------------------------------------------------------------|--------|----------|-----------|--------|-------|--------------------------------------------------------|----|
| 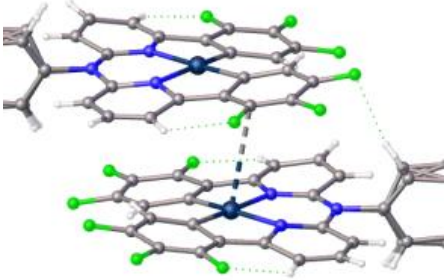  | CIZPAF | 3.44(4)  | 3.982(14) | 35.76  | 0.847 | Classified as Pt- $\pi$ interactions                   | 22 |
|   | DIFHIM | 3.792(2) | 4.577     | 43.69  | 0.934 | This contact was not mentioned in the original article | 23 |
|  | KISYER | 3.274(7) | 4.128     | 14.764 | 0.806 | This contact was not mentioned in the original article | 24 |

|                                                                                    |        |           |          |        |       |                                                        |    |
|------------------------------------------------------------------------------------|--------|-----------|----------|--------|-------|--------------------------------------------------------|----|
| 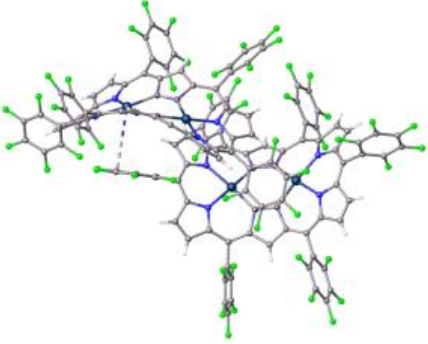  | LURFAI | 3.963(11) | 4.238(4) | 20.49  | 0.976 | This contact was not mentioned in the original article | 25 |
|   | SAXVAP | 3.542(4)  | 4.029    | 33.115 | 0.872 | This contact was not mentioned in the original article | 26 |
|  | ULAYAJ | 3.665(13) | 4.297    | 38.079 | 0.903 | This contact was not mentioned in the original article | 27 |



|                                                                                   |        |          |            |          |       |                                                        |    |
|-----------------------------------------------------------------------------------|--------|----------|------------|----------|-------|--------------------------------------------------------|----|
| 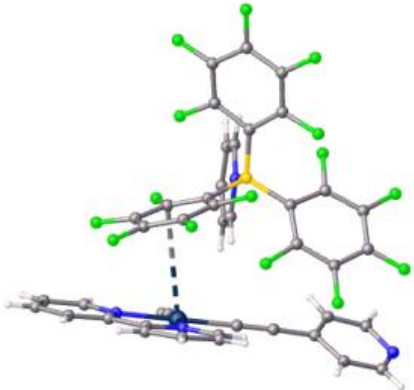 | UWIBIN | 3.905(3) | 4.326      | 28.387   | 0.962 | Classified as Pt-Pt and/or $\pi$ - $\pi$ interactions  | 11 |
|  | VALVUD | 3.512(5) | 3.3755(17) | 6.81(12) | 0.865 | This contact was not mentioned in the original article | 28 |

|                                                                                    |        |          |          |        |       |                                                        |    |
|------------------------------------------------------------------------------------|--------|----------|----------|--------|-------|--------------------------------------------------------|----|
| 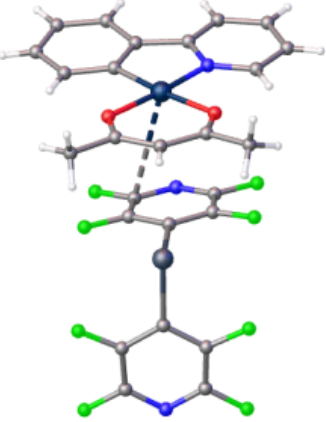  | VALWAK | 3.551(7) | 3.340(2) | 6.54   | 0.875 | This contact was not mentioned in the original article | 28 |
| M = Pd                                                                             |        |          |          |        |       |                                                        |    |
|   | KAHLUC | 3.289(5) | 3.991    | 13.351 | 0.839 | This contact was not mentioned in the original article | 29 |
|  | KISXOA | 3.389(5) | 3.318(2) | 16.58  | 0.865 | This contact was not mentioned in the original article | 24 |

|                                                                                    |          |           |          |       |       |                                                                             |               |
|------------------------------------------------------------------------------------|----------|-----------|----------|-------|-------|-----------------------------------------------------------------------------|---------------|
| 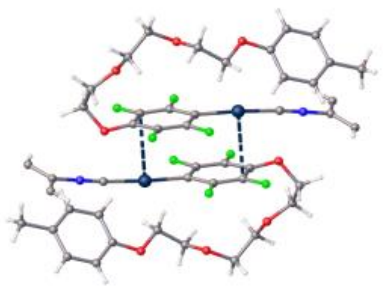  | DEFRUE01 | 3.403(6)  | 3.745    | 25.58 | 0.832 | Classified as $\pi$ -hole $\cdots$ Au interactions                          | <sup>30</sup> |
|   | DEFSEP   | 3.404(13) | 3.683    | 22.47 | 0.832 | Classified as $\pi$ -hole $\cdots$ Au interactions                          | <sup>30</sup> |
|   | OLIKUQ   | 3.346(6)  | 3.673(2) | 24.59 | 0.818 | This contact was not mentioned in the original article                      | <sup>31</sup> |
|  | TEDSID   | 3.501(11) | 3.496(4) | 12.11 | 0.856 | Classified by the authors as Au- $\pi$ interactions, $\pi$ - $\pi$ stacking | <sup>32</sup> |

|                                                                                    |        |           |            |       |       |                                                           |    |
|------------------------------------------------------------------------------------|--------|-----------|------------|-------|-------|-----------------------------------------------------------|----|
| 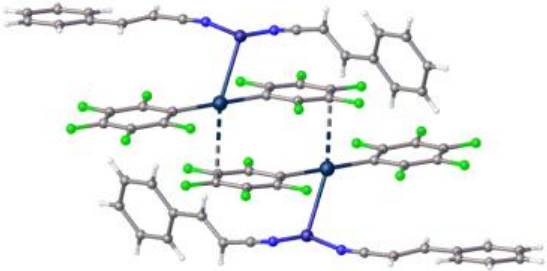  | TUDCEB | 3.329(4)  | 3.7196(17) | 28.75 | 0.814 | These contacts were not mentioned in the original article | 33 |
|   | WUHJUH | 3.603(5)  | 3.818      | 22.1  | 0.881 | These contacts were not mentioned in the original article | 34 |
|   | WUHKAO | 3.606(5)  | 3.796      | 21.03 | 0.882 | These contacts were not mentioned in the original article | 34 |
|  | WUHKES | 3.609(12) | 3.817      | 21.84 | 0.882 | These contacts were not mentioned in the original article | 34 |

|                                                                                    |        |           |          |       |       |                                                           |    |
|------------------------------------------------------------------------------------|--------|-----------|----------|-------|-------|-----------------------------------------------------------|----|
| 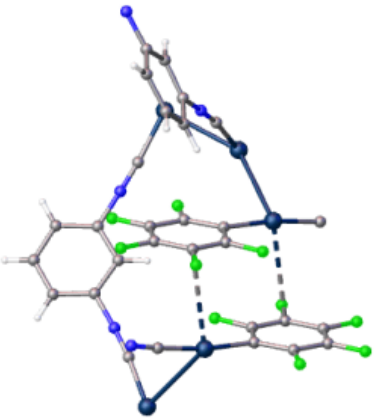  | WUHKUI | 3.578(10) | 3.797    | 21.16 | 0.875 | These contacts were not mentioned in the original article | 34 |
| M = Cu                                                                             |        |           |          |       |       |                                                           |    |
|  | TUDCAX | 3.688(9)  | 3.621(4) | 9.09  | 0.889 | These contacts were not mentioned in the original article | 33 |
| Group 3 (N-C...M)                                                                  |        |           |          |       |       |                                                           |    |
| M = Pt                                                                             |        |           |          |       |       |                                                           |    |

|                                                                                   |        |           |   |      |       |                                                                                                                                                                   |    |
|-----------------------------------------------------------------------------------|--------|-----------|---|------|-------|-------------------------------------------------------------------------------------------------------------------------------------------------------------------|----|
| 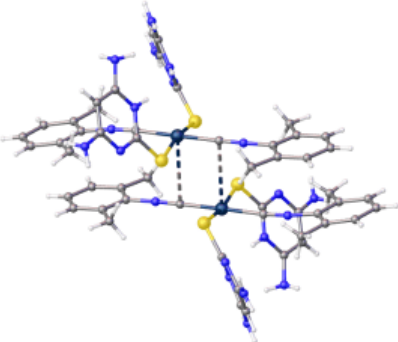 | BOJKIX | 3.537(9)  | - | 88.0 | 0.871 | Classified as $\pi$ -hole $\cdots$ Pt <sup>II</sup> interactions                                                                                                  | 35 |
|  | KEJGUE | 3.573(14) | - | 85.5 | 0.880 | These contacts were not mentioned in the original article; no $\pi$ - $\pi$ interactions observed; classified by the authors as C-H- $\pi$ or C-H-Pt interactions | 36 |
| M = Pd                                                                            |        |           |   |      |       |                                                                                                                                                                   |    |

|                                                                                   |        |           |   |        |       |                                                           |    |
|-----------------------------------------------------------------------------------|--------|-----------|---|--------|-------|-----------------------------------------------------------|----|
| 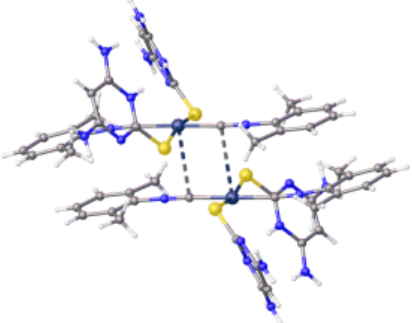 | BOJJIW | 3.527(3)  | - | 90.23° | 0.900 | Classified as $\pi$ -hole···Pd <sup>II</sup> interactions | 35 |
| M = Au                                                                            |        |           |   |        |       |                                                           |    |
|  | BESYOQ | 3.729(17) | - | 100.1  | 0.912 | This contact was not mentioned in the original article    | 37 |



|                                                                                   |          |           |   |      |       |                                                           |    |
|-----------------------------------------------------------------------------------|----------|-----------|---|------|-------|-----------------------------------------------------------|----|
| 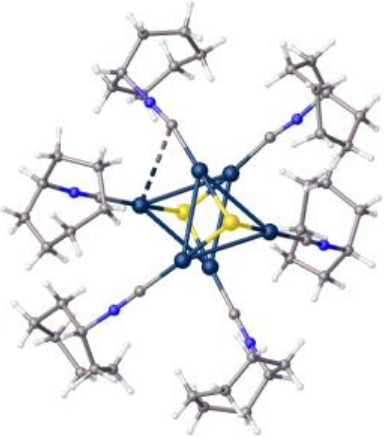 | CAVMUI01 | 3.489(19) | - | 71.1 | 0.853 | This contact was not mentioned in the original article    | 38 |
|  | HUDMEY   | 3.644(15) | - | 92.1 | 0.891 | These contacts were not mentioned in the original article | 39 |

|                                                                                   |        |           |   |      |       |                                          |    |
|-----------------------------------------------------------------------------------|--------|-----------|---|------|-------|------------------------------------------|----|
| 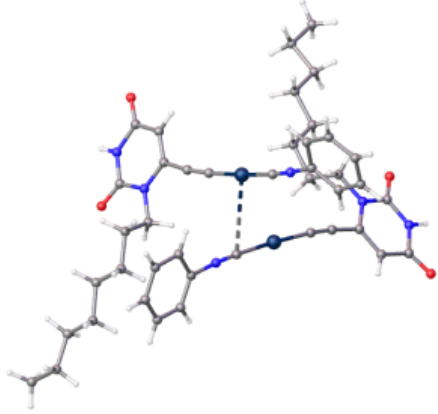 | XORGES | 3.556(10) | - | 89.2 | 0.869 | Classified as $\pi$ - $\pi$ interactions | 40 |
|-----------------------------------------------------------------------------------|--------|-----------|---|------|-------|------------------------------------------|----|

1. C. R. Groom, I. J. Bruno, M. P. Lightfoot and S. C. Ward, The Cambridge Structural Database, *Acta Crystallographica Section B*, 2016, **72**, 171-179.
2. C.-M. Che, Y.-J. Hou, M. C. W. Chan, J. Guo, Y. Liu and Y. Wang, [meso-Tetrakis(pentafluorophenyl)porphyrinato]platinum(ii) as an efficient, oxidation-resistant red phosphor: spectroscopic properties and applications in organic light-emitting diodes, *J. Mater. Chem.*, 2003, **13**, 1362-1366.
3. L. E. Zelenkov, A. A. Eliseeva, S. V. Baykov, D. M. Ivanov, A. I. Sumina, R. M. Gomila, A. Frontera, V. Y. Kukushkin and N. A. Bokach, Inorganic-organic {dz<sup>2</sup>-MII<sub>2</sub>S<sub>4</sub>} $\cdots\pi$ -hole stacking in reverse sandwich structures: the case of cocrystals of group 10 metal dithiocarbamates with electron-deficient arenes, *Inorganic Chemistry Frontiers*, 2022, **9**, 2869-2879.
4. T. Kusamoto, K. Takada, R. Sakamoto, S. Kume and H. Nishihara, Ferrocene-Dithiolene Hybrids: Control of Strong Donor-Acceptor Electronic Communication to Reverse the Charge Transfer Direction, *Inorganic Chemistry*, 2012, **51**, 12102-12113.
5. V. Sivchik, A. Kochetov, T. Eskelinen, K. S. Kisel, A. I. Solomatina, E. V. Grachova, S. P. Tunik, P. Hirva and I. O. Koshevoy, Modulation of Metallophilic and  $\pi$ - $\pi$  Interactions in Platinum Cyclometalated Luminophores with Halogen Bonding, *Chemistry – A European Journal*, 2021, **27**, 1787-1794.
6. V. Sivchik, R. K. Sarker, Z.-Y. Liu, K.-Y. Chung, E. V. Grachova, A. J. Karttunen, P.-T. Chou and I. O. Koshevoy, Improvement of the Photophysical Performance of Platinum-Cyclometalated Complexes in Halogen-Bonded Adducts, *Chem. - Eur. J.*, 2018, **24**, 11475-11484.
7. V. V. Sivchik, A. I. Solomatina, Y.-T. Chen, A. J. Karttunen, S. P. Tunik, P.-T. Chou and I. O. Koshevoy, Halogen Bonding to Amplify Luminescence: A Case Study Using a Platinum Cyclometalated Complex, *Angewandte Chemie International Edition*, 2015, **54**, 14057-14060.
8. B. W. Smucker, J. M. Hudson, M. A. Omary and K. R. Dunbar, Structural, Magnetic, and Optoelectronic Properties of (Diimine)(dithiolato)platinum(II) and -palladium(II) Complexes and Their Charge-Transfer Adducts with Nitrile Acceptors, *Inorganic Chemistry*, 2003, **42**, 4714-4723.
9. A. V. Rozhkov, I. V. Ananyev, R. M. Gomila, A. Frontera and V. Y. Kukushkin,  $\pi$ -Hole $\cdots$ dz<sup>2</sup>[PtII] Interactions with Electron-Deficient Arenes Enhance the Phosphorescence of PtII-Based Luminophores, *Inorganic Chemistry*, 2020, **59**, 9308-9314.
10. A. V. Rozhkov, M. A. Krykova, D. M. Ivanov, A. S. Novikov, A. A. Sinelshchikova, M. V. Volostnykh, M. A. Konovalov, M. S. Grigoriev, Y. G. Gorbunova and V. Y. Kukushkin, Reverse Arene Sandwich Structures Based upon  $\pi$ -Hole $\cdots$ [MII] (d<sup>8</sup> M=Pt, Pd) Interactions, where Positively Charged Metal Centers Play the Role of a Nucleophile, *Angew. Chem. Int. Ed.*, 2019, **58**, 4164-4168.

11. S. A. Katkova, K. V. Luzyanin, A. S. Novikov and M. A. Kinzhalov, Modulation of luminescence properties for [cyclometalated]-PtII(isocyanide) complexes upon co-crystallisation with halosubstituted perfluorinated arenes, *New Journal of Chemistry*, 2021, **45**, 2948-2952.
12. Y. V. Torubaev, I. V. Skabitsky, A. V. Rozhkov, B. Galmés, A. Frontera and V. Y. Kukushkin, Highly polar stacking interactions wrap inorganics in organics: lone-pair- $\pi$ -hole interactions between the PdO<sub>4</sub> core and electron-deficient arenes, *Inorganic Chemistry Frontiers*, 2021, **8**, 4965-4975.
13. O. Elbjeirami, M. D. Rashdan, V. Nesterov and M. A. Rawashdeh-Omary, Structure and luminescence properties of a well-known macrometallocyclic trinuclear Au(I) complex and its adduct with a perfluorinated fluorophore showing cooperative anisotropic supramolecular interactions, *Dalton Transactions*, 2010, **39**, 9465-9468.
14. M. A. Rawashdeh-Omary, M. A. Omary, J. P. Fackler, R. Galassi, B. R. Pietroni and A. Burini, Chemistry and Optoelectronic Properties of Stacked Supramolecular Entities of Trinuclear Gold(I) Complexes Sandwiching Small Organic Acids, *Journal of the American Chemical Society*, 2001, **123**, 9689-9691.
15. A. A. Mohamed, M. A. Rawashdeh-Omary, M. A. Omary and J. J. P. Fackler, External heavy-atom effect of gold in a supramolecular acid-base  $\pi$  stack, *Dalton Trans.*, 2005, **15**, 2597-2602.
16. Z. M. Efimenko, A. A. Eliseeva, D. M. Ivanov, B. Galmés, A. Frontera, N. A. Bokach and V. Y. Kukushkin, Bifurcated  $\mu$ -I $\cdots$ (N,O) Halogen Bonding: The Case of (Nitrosoguanidinate)NiII Cocrystals with Iodine(I)-Based  $\sigma$ -Hole Donors, *Crystal Growth & Design*, 2021, **21**, 588-596.
17. D. Blasi, V. Nicolai, R. M. Gomila, P. Mercandelli, A. Frontera and L. Carlucci, Unprecedented {dz<sup>2</sup>-CuIIIO<sub>4</sub>} $\cdots\pi$ -hole interactions: the case of a cocrystal of a Cu(II) bis- $\beta$ -diketonate complex with 1,4-diiodotetrafluoro-benzene, *Chemical Communications*, 2022, **58**, 9524-9527.
18. B. A. Suslick, A. L. Liberman-Martin, T. C. Wambach and T. D. Tilley, Olefin Hydroarylation Catalyzed by (pyridyl-indolate)Pt(II) Complexes: Catalytic Efficiencies and Mechanistic Aspects, *ACS Catalysis*, 2017, **7**, 4313-4322.
19. P. Pushpanandan, Y. K. Maurya, T. Omagari, R. Hirosawa, M. Ishida, S. Mori, Y. Yasutake, S. Fukatsu, J. Mack, T. Nyokong and H. Furuta, Singly and Doubly N-Confused Calix[4]phyrin Organoplatinum(II) Complexes as Near-IR Triplet Sensitizers, *Inorganic Chemistry*, 2017, **56**, 12572-12580.
20. V. Phillips, K. J. Willard, J. A. Golen, C. J. Moore, A. L. Rheingold and L. H. Doerrer, Electronic Influences on Metallophilic Interactions in [Pt(tpy)X][Au(C<sub>6</sub>F<sub>5</sub>)<sub>2</sub>] Double Salts, *Inorganic Chemistry*, 2010, **49**, 9265-9274.
21. M. Crespo, M. Font-Bardía and X. Solans, Formation and cleavage of platinacycles containing a fluorinated imine. Crystal structure of [PtMe(3,4,5-C<sub>6</sub>HF<sub>3</sub>CH=NCH<sub>2</sub>C<sub>6</sub>H<sub>5</sub>)PPh<sub>3</sub>], *Polyhedron*, 2002, **21**, 105-113.
22. S. Wilde, L. Stegemann, C. G. Daniliuc, T. Koch, N. L. Doltsinis and C. A. Strassert, Studie über den Einfluss des Fluorierungsgrades an einem tetradentaten C<sup>N</sup>\*N<sup>C</sup>-Luminophor auf die photophysikalischen Eigenschaften seiner Platin(II)-Komplexe und deren Aggregation, *Zeitschrift für Naturforschung B*, 2018, **73**, 849-863.
23. D. Suter, L. T. C. G. van Summeren, O. Blaque and K. Venkatesan, Highly Stable and Strongly Emitting N-Heterocyclic Carbene Platinum(II) Biaryl Complexes, *Inorganic Chemistry*, 2018, **57**, 8160-8168.
24. Y. Tanaka, S. Saito, S. Mori, N. Aratani, H. Shinokubo, N. Shibata, Y. Higuchi, Z. S. Yoon, K. S. Kim, S. B. Noh, J. K. Park, D. Kim and A. Osuka, Metalation of Expanded Porphyrins: A Chemical Trigger Used To Produce Molecular Twisting and Möbius Aromaticity, *Angewandte Chemie International Edition*, 2008, **47**, 681-684.
25. Y. Wang, K. Ogasahara, D. Tomihama, R. Mysliborski, M. Ishida, Y. Hong, Y. Notsuka, Y. Yamaoka, T. Murayama, A. Muranaka, M. Uchiyama, S. Mori, Y. Yasutake, S. Fukatsu, D. Kim and H. Furuta, Near-Infrared-III-Absorbing and -Emitting Dyes: Energy-Gap Engineering of Expanded Porphyrinoids via Metallation, *Angewandte Chemie International Edition*, 2020, **59**, 16161-16166.

26. F. Zhang, C. W. Kirby, D. W. Hairsine, M. C. Jennings and R. J. Puddephatt, Activation of C–H Bonds of Arenes: Selectivity and Reactivity in Bis(pyridyl) Platinum(II) Complexes, *Journal of the American Chemical Society*, 2005, **127**, 14196-14197.
27. A. L. Liberman-Martin, D. S. Levine, W. Liu, R. G. Bergman and T. D. Tilley, Biaryl Reductive Elimination Is Dramatically Accelerated by Remote Lewis Acid Binding to a 2,2'-Bipyrimidyl–Platinum Complex: Evidence for a Bidentate Ligand Dissociation Mechanism, *Organometallics*, 2016, **35**, 1064-1069.
28. A. V. Rozhkov, E. A. Katlenok, M. V. Zhmykhova, A. Y. Ivanov, M. L. Kuznetsov, N. A. Bokach and V. Y. Kukushkin, Metal-Involving Chalcogen Bond. The Case of Platinum(II) Interaction with Se/Te-Based  $\sigma$ -Hole Donors, *Journal of the American Chemical Society*, 2021, **143**, 15701-15710.
29. T. Tanaka, T. Sugita, S. Tokuji, S. Saito and A. Osuka, Metal Complexes of Chiral Möbius Aromatic [28]Hexaphyrin(1.1.1.1.1.1): Enantiomeric Separation, Absolute Stereochemistry, and Asymmetric Synthesis, *Angewandte Chemie International Edition*, 2010, **49**, 6619-6621.
30. T. Seki, K. Kashiyama, S. Yagai and H. Ito, Tuning the Lifetime of Transient Phases of Mechanochromic Gold Isocyanide Complexes through Functionalization of the Terminal Moieties of Flexible Side Chains, *Chemistry Letters*, 2017, **46**, 1415-1418.
31. J. Coetzee, S. Cronje, L. Dobrzańska, H. G. Raubenheimer, G. Jooné, M. J. Nell and H. C. Hoppe, Novel N-heterocyclic ylidenamine gold(i) complexes: synthesis, characterisation and screening for antitumour and antimalarial activity, *Dalton Transactions*, 2011, **40**, 1471-1483.
32. T. Seki, K. Ida and H. Ito, A meta-diisocyanide benzene-based aryl gold isocyanide complex exhibiting multiple solid-state molecular arrangements and luminescent mechanochromism, *Materials Chemistry Frontiers*, 2018, **2**, 1195-1200.
33. E. J. Fernández, A. Laguna, J. M. López-de-Luzuriaga, M. Monge, M. Montiel, M. E. Olmos and M. Rodríguez-Castillo, Unsupported Au(i)···Cu(i) interactions: influence of nitrile ligands and aurophilicity on the structure and luminescence, *Dalton Transactions*, 2009, **36**, 7509-7518.
34. T. Seki, K. Ida, H. Sato, S. Aono, S. Sakaki and H. Ito, Aurophilicity-Mediated Construction of Emissive Porous Molecular Crystals as Versatile Hosts for Liquid and Solid Guests, *Chemistry – A European Journal*, 2020, **26**, 735-744.
35. S. A. Katkova, A. S. Mikherdov, M. A. Kinzhalov, A. S. Novikov, A. A. Zolotarev, V. P. Boyarskiy and V. Y. Kukushkin, (Isocyano Group  $\pi$ -Hole)···[d - MII] Interactions of (Isocyanide)[MII] Complexes, in which Positively Charged Metal Centers (d8-M=Pt, Pd) Act as Nucleophiles, *Chemistry – A European Journal*, 2019, **25**, 8590-8598.
36. H. R. Shahsavari, R. Babadi Aghakhanpour, M. Hossein-Abadi, M. Golbon Haghghi, B. Notash and M. Fereidoonhezad, A new approach to the effects of isocyanide (CN-R) ligands on the luminescence properties of cycloplatinated(ii) complexes, *New Journal of Chemistry*, 2017, **41**, 15347-15356.
37. M. Fereidoonhezad, H. R. Shahsavari, E. Lotfi, M. Babaghasabha, M. Fakhri, Z. Faghiih, Z. Faghiih and M. Hassan Beyzavi, (Benzyl isocyanide)gold(I) pyrimidine-2-thiolate complex: Synthesis and biological activity, *Applied Organometallic Chemistry*, 2018, **32**, e4200.
38. E. M. Gussenhoven, J. C. Fettingner, D. M. Pham, M. M. Malwitz and A. L. Balch, A Reversible Polymorphic Phase Change Which Affects the Luminescence and Aurophilic Interactions in the Gold(I) Cluster Complex, [ $\mu$ 3-S(AuCNC7H13)3](SbF6), *Journal of the American Chemical Society*, 2005, **127**, 10838-10839.
39. D. Lentz and S. Willemsen, Transition metal complexes of 2,2,2-trifluoroethyl isocyanide and 1H,1H-perfluorooctyl isocyanide, *Journal of Organometallic Chemistry*, 2000, **612**, 96-105.
40. Y. Sakamoto, T. Moriuchi and T. Hirao, Organogold(I)-uracil conjugates: Synthesis and structural characterization, *Journal of Organometallic Chemistry*, 2015, **782**, 77-81.

### 3. Computational details

#### 3.1. Geometry

The optimization of [1·OFA·1] led to a negligible geometry distortion: the distance  $Q_{Pt(A)}$  was reduced, while the  $Q_{Pt(C)}$  separations increased by 0.1 Å (for  $Q_{Pt(A)}$ ) and 0.5 Å (for  $Q_{Pt(C)}$ ) (**Figure S5**). A similar trend was also verified for the distances, which reflect the  $\pi$ - $\pi$  stacking between cyclometalated ligands and perfluoroarenes. Indeed, the distance between the centroids of the naphthyl fragment in complex **A** and the perfluoroarene decreases (by 0.2 Å), while the separation between- the benzothiazole fragment in complex **C** and the perfluoroarene increases (by 0.2 Å) (**Table S3**). Notably, when the optimization was performed for [1·OFA], OFA undergoes the greatest distortion of the molecular plane: two planes involving the terminal aromatic rings intersect along the central C–C direction with the torsion angle 17.6° (**Figure S7**).

The geometry parameters of the [1·OFA·1] most closely matched the geometry of the X-ray structure. The optimized geometry for [1·C<sub>6</sub>F<sub>6</sub>·1] exhibits a shift of the perfluoroarene toward the naphthyl fragment, as follows from an increased  $Q_{Pt}$  distance (by 0.1 Å) and  $\pi$ - $\pi$  stacking (by 0.3 Å) between the naphthyl fragments and the C<sub>6</sub>F<sub>6</sub> fragment. Considering the optimized geometries of the bimolecular and trimolecular models, it can be concluded that, in general, the geometries are similar (**Figure S6**). However, a comparison of the geometry of the bimolecular and trimolecular models with X-ray diffraction analysis shows that the geometry in the binuclear model agrees best with the experimental geometry. Finally, in the optimized structure of 2·C<sub>6</sub>F<sub>6</sub>, we did not observe significant changes in the geometric position of the perfluoroarene in both the bimolecular and trimolecular models. Thus, the optimized structures of the trinuclear for (1–2)·Ar<sup>F</sup> are in a good agreement with the geometry obtained from the XRD experiments.

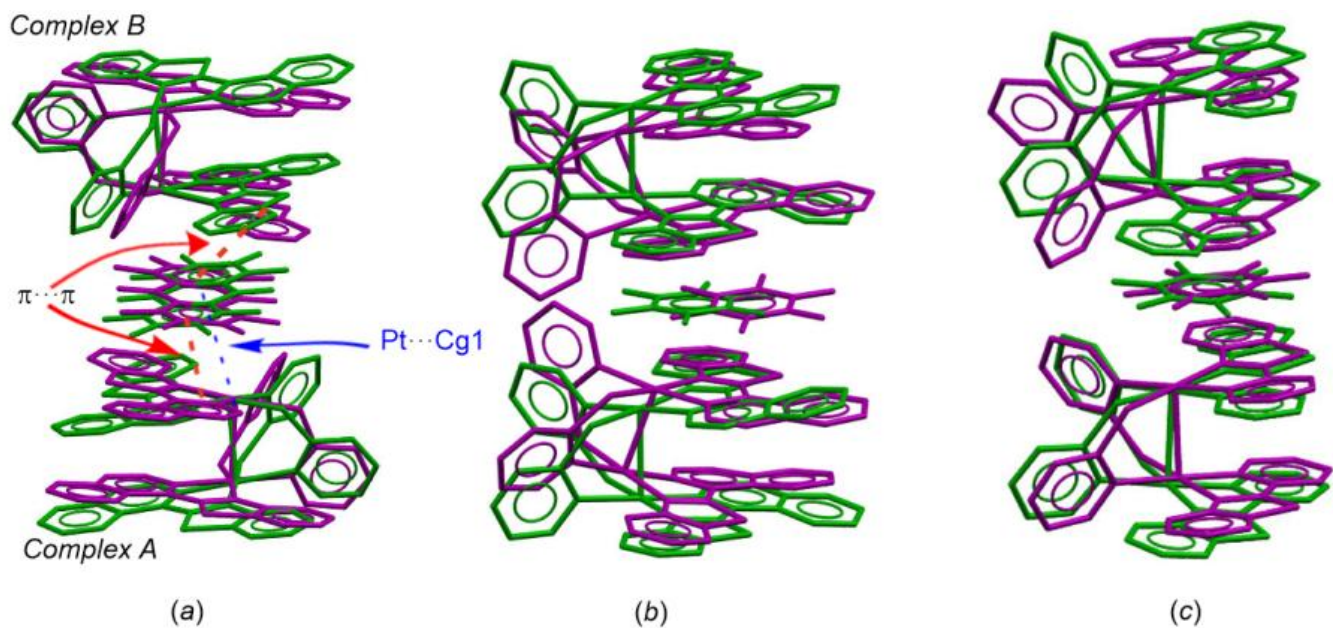

**Figure S6.** Overlaid images of [1·OFA·1] (a), [1·C<sub>6</sub>F<sub>6</sub>·1] (b), [2·C<sub>6</sub>F<sub>6</sub>·2] (c) in X-ray (green) and optimized (purple) geometries (hydrogen atoms were omitted for the sake of simplicity).

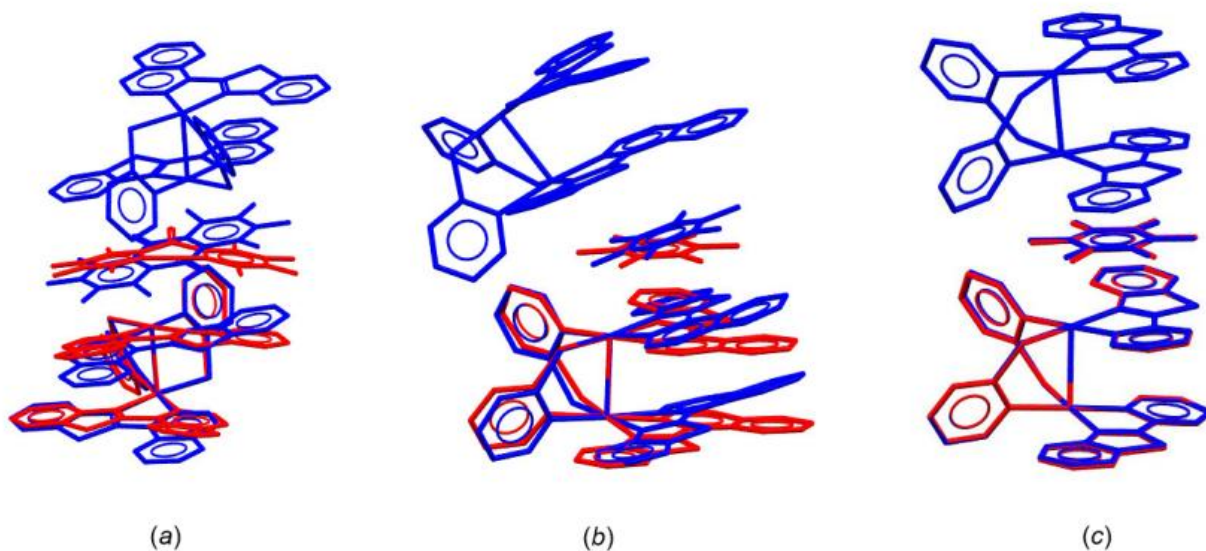

**Figure S7.** Overlaid images of [1·OFA·1] (a), [1·C<sub>6</sub>F<sub>6</sub>·1] (b), and [2·C<sub>6</sub>F<sub>6</sub>·2] (c) in trimolecular (blue) and bimolecular (red) optimized geometries (hydrogen atoms were omitted for the sake of simplicity).

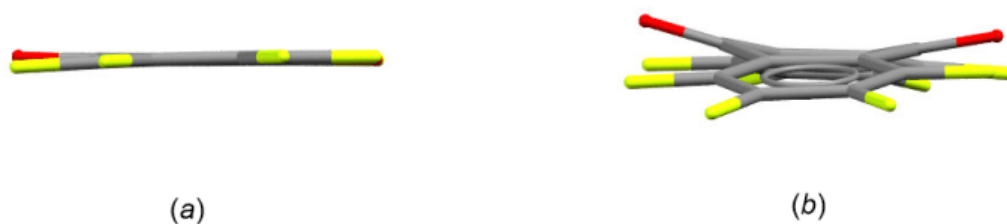

**Figure S8.** X-ray (a) and optimized structures (b) of OFA.

**Table S3.** Intermolecular distances of optimized and X-ray structures for the trimolecular and bimolecular models [(1/2)·Ar<sup>F</sup>]

|                                              | Pt(A, B)···Cg1,<br>Å | M···C, Å       | Q <sub>Pt</sub> , Å | π-π, Å             |
|----------------------------------------------|----------------------|----------------|---------------------|--------------------|
| [1·OFA·1] (X-ray)                            | 3.805                | 3.755          | 3.653               | 3.548*<br>3.548**  |
| [1·OFA·1]                                    | 3.817<br>3.852       | 3.474<br>3.487 | 3.507<br>3.520      | 3.309*<br>3.720**  |
| [1·OFA]                                      | 4.163                | 3.727          | 3.501               | 3.327*<br>3.323**  |
| [1·C <sub>6</sub> F <sub>6</sub> ·1] (X-ray) | 3.996<br>3.996       | 3.642<br>3.642 | 3.412               | 3.695*<br>3.695*   |
| [1·C <sub>6</sub> F <sub>6</sub> ·1]         | 4.301<br>4.289       | 3.541<br>3.548 | 3.296<br>3.206      | 3.387*<br>3.374*   |
| [1·C <sub>6</sub> F <sub>6</sub> ·]          | 3.747                | 3.354          | 3.231               | 3.501*             |
| [2·C <sub>6</sub> F <sub>6</sub> ·2] (X-ray) | 3.843<br>3.843       | 3.351          | 3.6122              | 3.458**<br>3.457** |
| [2·C <sub>6</sub> F <sub>6</sub> ·2]         | 3.682<br>3.682       | 3.357<br>3.364 | 3.305<br>3.294      | 3.520**<br>3.516** |
| [2·C <sub>6</sub> F <sub>6</sub> ·]          | 3.668                | 3.346          | 3.264               | 3.553**            |

\* – the distance between the centroids of the naphthyl fragment of the C<sup>N</sup> ligand and Ar<sup>F</sup>

\*\* – the distance between the centroids of the benzothiazole fragment of the C<sup>N</sup> ligand and Ar<sup>F</sup>

### 3.2. QTAIM

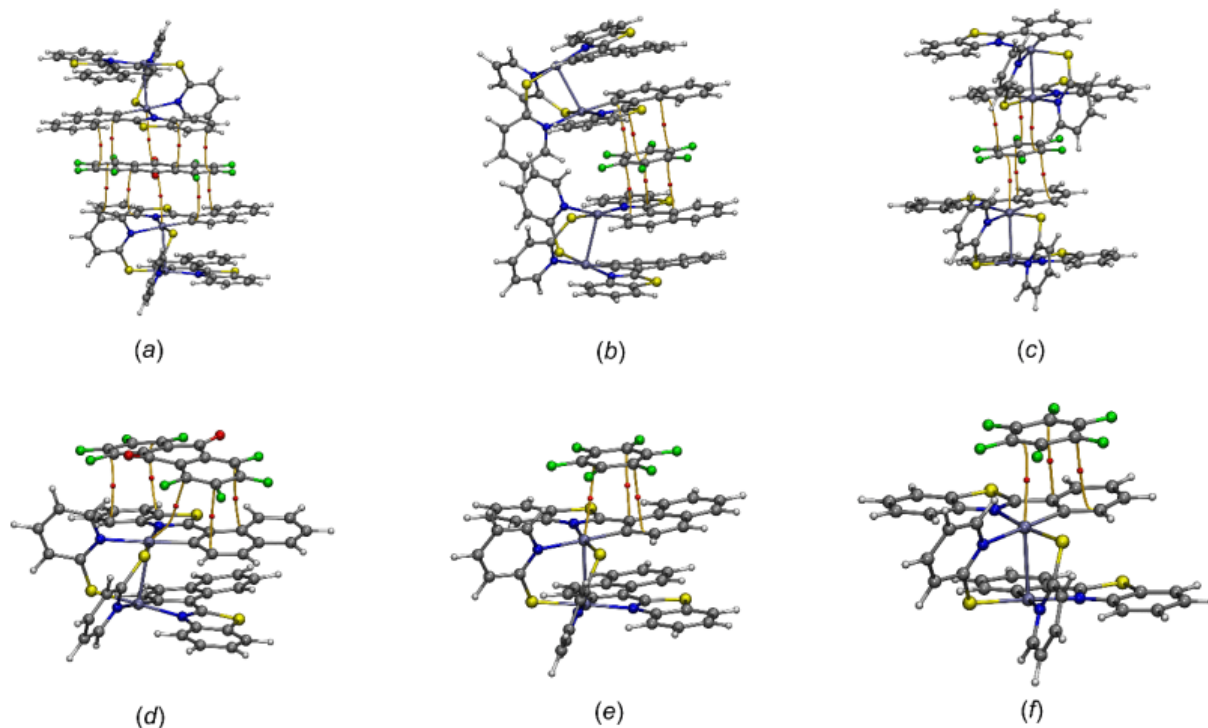



**Figure S9.** QTAIM distribution of bond critical points (red) and bond paths for (a) [1·OFA·1]; (b) [1·C<sub>6</sub>F<sub>6</sub>·1]; (c) [2·C<sub>6</sub>F<sub>6</sub>·2]; (d) [1·OFA]; (e) [1·C<sub>6</sub>F<sub>6</sub>]; (f) [2·C<sub>6</sub>F<sub>6</sub>].

**Table S4.** Electron density ( $\rho_b$ ), its Laplacian ( $\nabla^2\rho_b$ ), potential and kinetic energy densities ( $V_b$  and  $G_b$ ), second eigenvalue of the Hessian matrix ( $\lambda_2$ ), elliptical bond index ( $\varepsilon$ ), electron localization function at BCPs (in a.u.) calculated at the PBE0-D3BJ/ZORA-def2-TZVP level of theory.

| Contact              | Clusters                             | $\rho_b$ | $\nabla^2\rho_b$ | $V_b$   | $G_b$  | H      | $\varepsilon$ | $\lambda_2$ | ELF   |
|----------------------|--------------------------------------|----------|------------------|---------|--------|--------|---------------|-------------|-------|
| C··Pt                | [1·OFA·1]                            | 0.0084   | 0.0211           | -0.0040 | 0.0047 | 0.0006 | 2.18          | -0.0014     | 0.04  |
| C··Pt                | [1·OFA]                              | 0.0076   | 0.0210           | -0.0036 | 0.0045 | 0.0008 | 8.1           | -0.0003     | 0.03  |
| C··Pt                | [1·C <sub>6</sub> F <sub>6</sub> ]   | 0.0122   | 0.0305           | -0.0066 | 0.0071 | 0.0005 | 1.30          | -0.0032     | 0.06  |
| C··Pt                | [2·C <sub>6</sub> F <sub>6</sub> ·2] | 0.0128   | 0.0317           | -0.0069 | 0.0074 | 0.0005 | 1.34          | -0.0035     | 0.067 |
| C··Pt                | [2·C <sub>6</sub> F <sub>6</sub> ]   | 0.0128   | 0.0318           | -0.0069 | 0.0074 | 0.0005 | 1.47          | -0.0033     | 0.07  |
| C··C <sup>naph</sup> | [1·OTA·1]                            | 0.0082   | 0.0245           | -0.0040 | 0.0051 | 0.0011 | 1.06          | -0.0019     | 0.03  |
| C··C <sup>naph</sup> | [1·OTA·1]                            | 0.0073   | 0.0232           | -0.0035 | 0.0047 | 0.0011 | 5.99          | -0.0006     | 0.03  |
| C··C <sup>naph</sup> | [1·OTA]                              | 0.0081   | 0.0254           | -0.0041 | 0.0052 | 0.0011 | 3.15          | -0.0012     | 0.03  |
| C··C <sup>naph</sup> | [1·OTA]                              | 0.0084   | 0.0267           | -0.0043 | 0.0055 | 0.0012 | 0.66          | -0.0021     | 0.03  |
| C··C <sup>naph</sup> | [1·C <sub>6</sub> F <sub>6</sub> ·1] | 0.0098   | 0.0309           | -0.0053 | 0.0065 | 0.0012 | 0.11          | -0.0029     | 0.04  |
| C··C <sup>naph</sup> | [1·C <sub>6</sub> F <sub>6</sub> ·1] | 0.0083   | 0.0263           | -0.0043 | 0.0055 | 0.0011 | 0.80          | -0.0017     | 0.03  |
| C··C <sup>naph</sup> | [1·C <sub>6</sub> F <sub>6</sub> ·1] | 0.0090   | 0.0290           | -0.0047 | 0.0060 | 0.0013 | 2.17          | -0.0015     | 0.03  |
| C··C <sup>naph</sup> | [1·C <sub>6</sub> F <sub>6</sub> ]   | 0.0082   | 0.0256           | -0.0042 | 0.0053 | 0.0011 | 0.84          | -0.0018     | 0.03  |
| C··C <sup>naph</sup> | [1·C <sub>6</sub> F <sub>6</sub> ]   | 0.0090   | 0.0281           | -0.0047 | 0.0059 | 0.0012 | 1.49          | -0.0020     | 0.04  |
| C··C <sup>ph</sup>   | [2·C <sub>6</sub> F <sub>6</sub> ·2] | 0.0082   | 0.0245           | -0.0040 | 0.0050 | 0.0011 | 0.37          | -0.0024     | 0.03  |
| C··C <sup>ph</sup>   | [2·C <sub>6</sub> F <sub>6</sub> ·2] | 0.0091   | 0.0282           | -0.0047 | 0.0059 | 0.0012 | 0.99          | -0.0024     | 0.036 |
| C··C <sup>ph</sup>   | [2·C <sub>6</sub> F <sub>6</sub> ]   | 0.0081   | 0.0246           | -0.0040 | 0.0050 | 0.0011 | 0.19          | -0.0025     | 0.033 |
| C··C <sup>ph</sup>   | [2·C <sub>6</sub> F <sub>6</sub> ]   | 0.0089   | 0.0280           | -0.0046 | 0.0058 | 0.0012 | 0.76          | -0.0025     | 0.034 |
| C··C <sup>bt</sup>   | [1·OTA·1]                            | 0.0081   | 0.0253           | -0.0041 | 0.0052 | 0.0011 | 9.30          | -0.0004     | 0.02  |
| C··C <sup>bt</sup>   | [1·OTA·1]                            | 0.0093   | 0.0297           | -0.0050 | 0.0062 | 0.0012 | 2.56          | -0.0014     | 0.03  |
| C··C <sup>bt</sup>   | [1·OTA]                              | 0.0090   | 0.0273           | -0.0046 | 0.0057 | 0.0011 | 3.12          | -0.0013     | 0.04  |
| C··C <sup>bt</sup>   | [1·OTA]                              | 0.0083   | 0.0259           | -0.0041 | 0.0053 | 0.0012 | 9.71          | -0.0005     | 0.03  |



### 3.3 ETS–NOCV–CDF

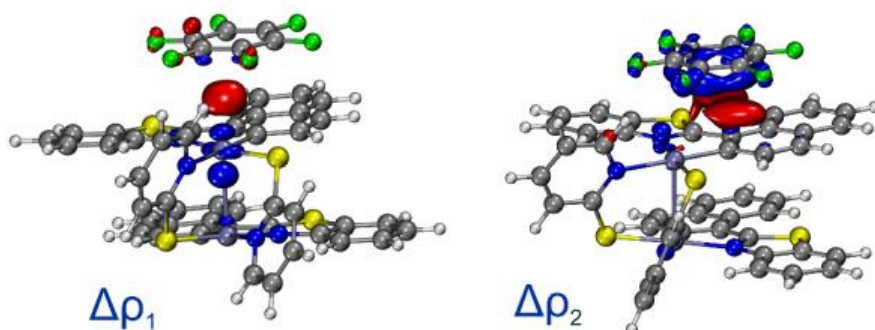

**Figure S10** ETS–NOCV deformation densities for [1·C<sub>6</sub>F<sub>6</sub>] (isovalues 0.0005 a.u., electrons transfer occurs from the decreased electron density regions (blue) to the increased electron density regions (red)).

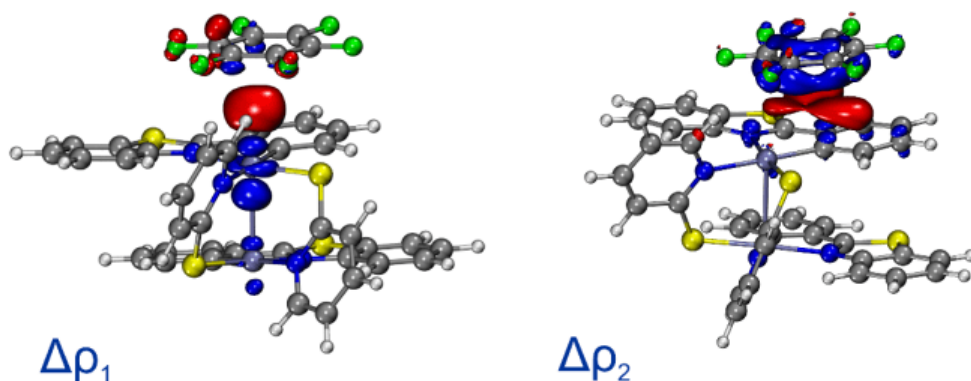

**Figure S11** ETS–NOCV deformation densities for [2·C<sub>6</sub>F<sub>6</sub>·2] (isovalues 0.0005 a.u., electrons transfer occurs from the decreased electron density regions (blue) to the increased electron density regions (red), the second molecule of the Pt complex in trimolecular clusters was omitted for clarity).

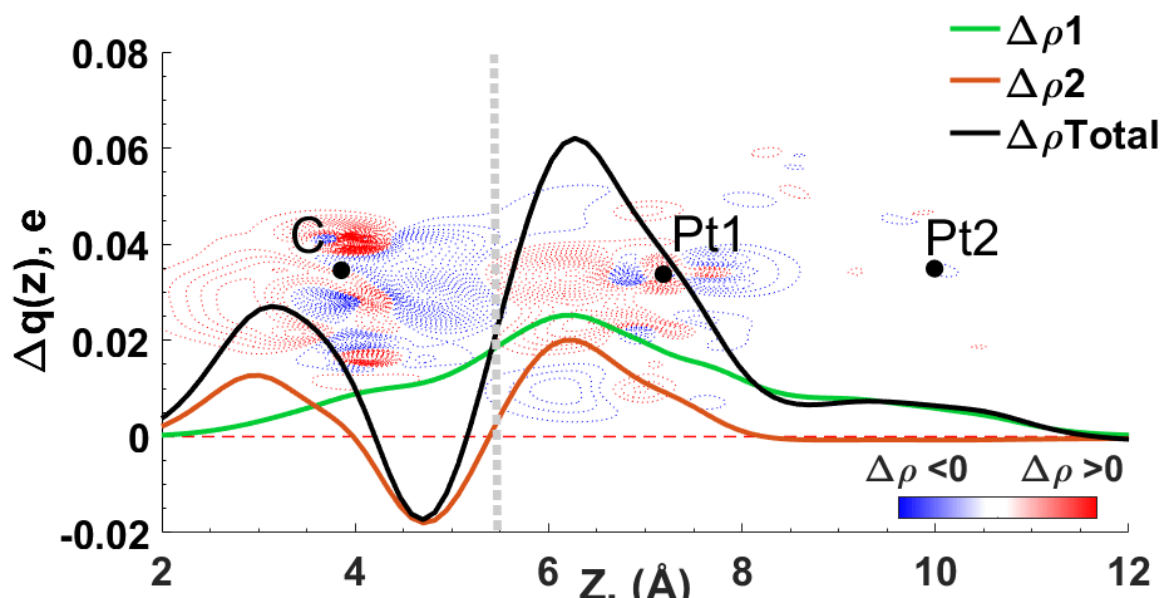

**Figure S12.** EDD contour plot (red – charge concentration, blue – charge depletion, range – 0.01 to 0.01 a.u., step 0.0005 a.u.) and CDF functions for the C···Pt interaction in  $[1 \cdot C_6F_6]$  (black dots indicate positions of the atomic nuclei, grey vertical lines identify the boundaries between the C, Pt2 and Pt1 atoms, which are placed along the z axis).

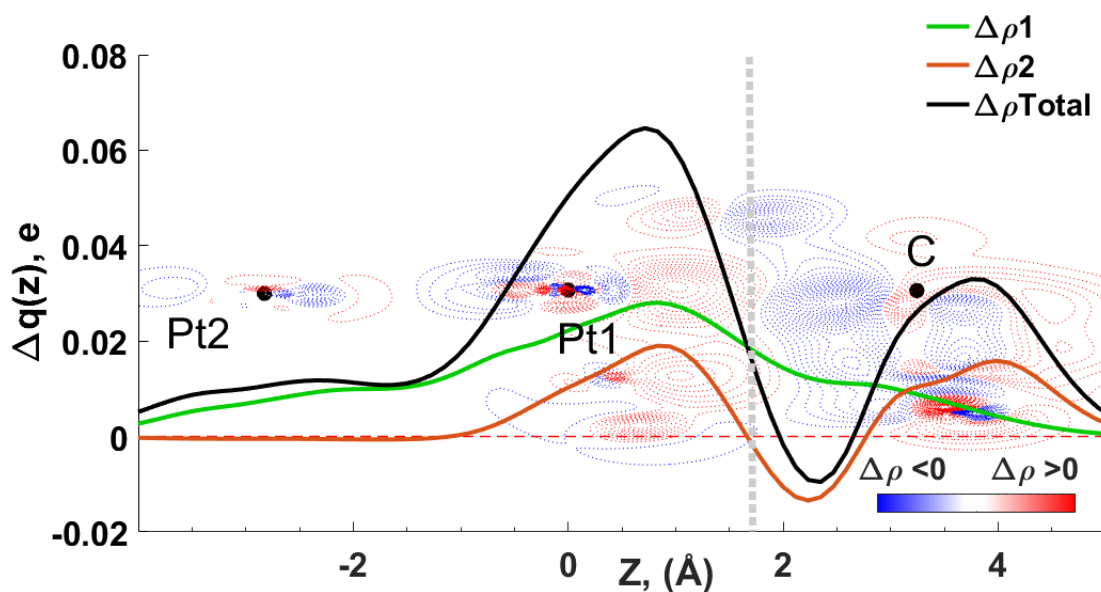

**Figure S13.** EDD contour plot (red – charge concentration, blue – charge depletion, range – 0.01 to 0.01 a.u., step 0.0005 a.u.) and CDF functions for the C···Pt interaction in  $[2 \cdot C_6F_6 \cdot 2]$  (black dots indicate positions of the atomic nuclei, grey vertical lines identify the boundaries between the C, Pt2 and Pt1 atoms, which are placed along the z axis).

## 4. Cartesian coordinates for the studied molecules

### Optimized geometries

Cartesian coordinates for [1·OFA] (in Å)

|    |              |              |              |
|----|--------------|--------------|--------------|
| Pt | -0.094091000 | -2.812509000 | 7.307402000  |
| Pt | -0.107045000 | -2.997332000 | 10.148798000 |
| S  | 0.005481000  | -5.101961000 | 7.264754000  |
| S  | 2.043004000  | -2.214308000 | 10.165001000 |
| S  | -1.954629000 | 1.264629000  | 6.973936000  |
| S  | -4.584068000 | -2.870447000 | 10.085239000 |
| N  | -0.392701000 | -0.775295000 | 7.144832000  |
| N  | 0.784886000  | -4.920201000 | 9.868014000  |
| N  | 2.045366000  | -2.925517000 | 7.531670000  |
| N  | -2.098674000 | -3.510484000 | 10.210675000 |
| C  | -0.913722000 | -1.209027000 | 10.390965000 |
| C  | -2.629018000 | -1.501984000 | 6.774885000  |
| C  | 2.680193000  | -3.303898000 | 6.405559000  |
| H  | 2.046434000  | -3.481783000 | 5.540411000  |
| C  | -1.662614000 | -0.445345000 | 6.918087000  |
| C  | -2.901012000 | -2.453065000 | 10.136993000 |
| C  | -2.308528000 | -1.141327000 | 10.196580000 |
| C  | 0.410030000  | 0.318053000  | 7.399318000  |
| C  | 1.777910000  | 0.326772000  | 7.692560000  |
| H  | 2.336930000  | -0.599390000 | 7.692233000  |
| C  | -4.032999000 | -1.335523000 | 6.514627000  |
| C  | -4.265332000 | -3.762316000 | 6.808724000  |
| H  | -4.906658000 | -4.643505000 | 6.840515000  |
| C  | -0.222108000 | 0.000452000  | 10.656942000 |
| H  | 0.851462000  | -0.027635000 | 10.829552000 |
| C  | 1.344106000  | -6.932038000 | 8.705880000  |
| H  | 1.316728000  | -7.491395000 | 7.773661000  |
| C  | -2.048170000 | -2.770539000 | 6.988950000  |
| C  | 2.398169000  | 1.537326000  | 7.969531000  |
| H  | 3.460959000  | 1.544271000  | 8.201813000  |
| C  | -4.862122000 | -2.498481000 | 6.560421000  |
| C  | 2.759917000  | -2.719576000 | 8.662171000  |
| C  | -0.288148000 | 1.542787000  | 7.356983000  |
| C  | 4.053095000  | -3.431979000 | 6.316060000  |
| H  | 4.505246000  | -3.712541000 | 5.368854000  |
| C  | 1.410309000  | -5.409489000 | 10.956510000 |
| H  | 1.417743000  | -4.747701000 | 11.820321000 |
| C  | -2.234351000 | -6.000496000 | 10.278467000 |
| H  | -1.162583000 | -6.135565000 | 10.358331000 |
| C  | -2.775811000 | -4.710624000 | 10.212488000 |
| C  | 1.989537000  | -6.661834000 | 10.999688000 |
| H  | 2.467740000  | -7.010329000 | 11.911147000 |
| C  | -2.914846000 | -3.896643000 | 7.002244000  |
| H  | -2.495058000 | -4.883575000 | 7.183696000  |
| C  | 4.165453000  | -2.840370000 | 8.634698000  |
| H  | 4.712754000  | -2.672555000 | 9.559320000  |

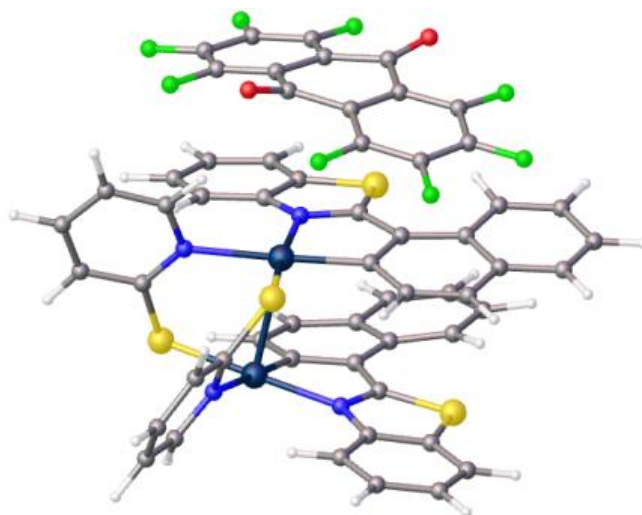

|   |              |              |              |
|---|--------------|--------------|--------------|
| C | -2.256574000 | 1.304981000  | 10.351185000 |
| C | -2.998402000 | 0.111177000  | 10.084422000 |
| C | -0.878005000 | 1.205331000  | 10.674846000 |
| H | -0.327849000 | 2.121743000  | 10.889717000 |
| C | 0.332752000  | 2.761374000  | 7.625980000  |
| H | -0.228273000 | 3.692784000  | 7.585282000  |
| C | 4.812903000  | -3.183086000 | 7.463073000  |
| H | 5.898304000  | -3.273035000 | 7.444419000  |
| C | -3.092226000 | -7.090660000 | 10.240707000 |
| H | -2.673930000 | -8.094592000 | 10.284086000 |
| C | 1.941052000  | -7.445613000 | 9.838484000  |
| H | 2.386011000  | -8.439572000 | 9.819597000  |
| C | -2.883903000 | 2.566812000  | 10.226525000 |
| H | -2.298029000 | 3.459927000  | 10.443957000 |
| C | 1.686691000  | 2.746415000  | 7.940702000  |
| H | 2.199747000  | 3.682089000  | 8.153926000  |
| C | 0.766077000  | -5.641551000 | 8.726541000  |
| C | -4.193289000 | 2.672082000  | 9.812500000  |
| H | -4.662205000 | 3.648729000  | 9.704627000  |
| C | -4.917296000 | 1.502446000  | 9.509292000  |
| H | -5.939398000 | 1.574855000  | 9.141041000  |
| C | -6.255196000 | -2.383531000 | 6.345448000  |
| H | -6.861665000 | -3.287784000 | 6.390240000  |
| C | -4.657513000 | -0.105844000 | 6.190465000  |
| H | -4.070998000 | 0.797631000  | 6.057818000  |
| C | -4.338597000 | 0.257973000  | 9.649659000  |
| H | -4.921138000 | -0.609579000 | 9.352613000  |
| C | -4.176140000 | -4.556824000 | 10.140241000 |
| C | -6.017649000 | -0.021253000 | 5.980298000  |
| H | -6.457232000 | 0.940699000  | 5.721754000  |
| C | -6.834313000 | -1.164774000 | 6.073291000  |
| H | -7.907147000 | -1.086722000 | 5.906261000  |
| C | -4.482548000 | -6.924048000 | 10.147902000 |
| H | -5.132125000 | -7.796819000 | 10.117041000 |
| C | -5.039121000 | -5.651084000 | 10.103013000 |
| H | -6.116492000 | -5.509678000 | 10.040399000 |
| F | -4.199047000 | -0.634163000 | 3.239879000  |
| F | -0.339525000 | -4.305275000 | 4.137565000  |
| F | -2.884374000 | -5.012596000 | 4.025604000  |
| F | -4.802244000 | -3.189315000 | 3.535898000  |
| O | -2.360997000 | 1.221383000  | 3.160880000  |
| C | -0.877603000 | -2.024040000 | 3.778399000  |
| C | -1.885208000 | -1.056638000 | 3.568571000  |
| C | -1.552439000 | 0.389879000  | 3.513497000  |
| C | -1.222201000 | -3.367358000 | 3.908110000  |
| C | -3.215613000 | -1.466875000 | 3.457003000  |
| C | -3.548812000 | -2.813779000 | 3.607911000  |
| C | -2.560190000 | -3.756229000 | 3.849931000  |
| F | 3.070585000  | -0.668542000 | 4.739398000  |
| F | -0.783498000 | 3.067847000  | 4.139927000  |
| F | 1.652147000  | 3.745991000  | 4.884188000  |
| F | 3.581157000  | 1.888439000  | 5.170174000  |

|   |              |              |             |
|---|--------------|--------------|-------------|
| O | 1.443326000  | -2.428524000 | 3.652834000 |
| C | -0.181928000 | 0.776538000  | 3.951855000 |
| C | 0.831073000  | -0.196388000 | 4.105506000 |
| C | 0.548861000  | -1.627781000 | 3.832965000 |
| C | 0.109427000  | 2.114776000  | 4.215342000 |
| C | 2.103582000  | 0.188458000  | 4.522847000 |
| C | 2.384385000  | 1.532398000  | 4.770939000 |
| C | 1.392009000  | 2.487516000  | 4.622403000 |

## Cartesian coordinates for [1·OFA·1] (in Å)

|    |              |              |              |
|----|--------------|--------------|--------------|
| Pt | 11.222619000 | 10.406770000 | 5.957781000  |
| Pt | 11.222619000 | 10.406770000 | 5.957781000  |
| Pt | 12.505623000 | 8.454051000  | 4.359637000  |
| S  | 9.263949000  | 9.750751000  | 4.956199000  |
| S  | 12.951942000 | 7.367750000  | 6.332962000  |
| S  | 14.911361000 | 12.822603000 | 6.781062000  |
| S  | 13.182817000 | 11.087452000 | 0.786725000  |
| N  | 12.891623000 | 11.239346000 | 6.829242000  |
| N  | 10.610524000 | 7.447849000  | 4.428498000  |
| N  | 10.863189000 | 8.797448000  | 7.322421000  |
| N  | 12.360893000 | 9.380546000  | 2.521455000  |
| C  | 14.247746000 | 9.398143000  | 4.307550000  |
| C  | 12.787337000 | 12.589679000 | 4.872013000  |
| C  | 9.849982000  | 8.985770000  | 8.188457000  |
| H  | 9.243253000  | 9.874153000  | 8.019050000  |
| C  | 13.454653000 | 12.191610000 | 6.087874000  |
| C  | 13.373673000 | 10.205912000 | 2.270863000  |
| C  | 14.460101000 | 10.265638000 | 3.215075000  |
| C  | 13.583277000 | 10.970843000 | 7.992684000  |
| C  | 13.241908000 | 10.072646000 | 9.011481000  |
| H  | 12.340115000 | 9.480460000  | 8.937915000  |
| C  | 13.219088000 | 13.613748000 | 3.960045000  |
| C  | 11.191893000 | 13.151644000 | 2.645211000  |
| H  | 10.569305000 | 13.376987000 | 1.779166000  |
| C  | 15.243080000 | 9.346283000  | 5.318195000  |
| H  | 15.095116000 | 8.691293000  | 6.174152000  |
| C  | 8.229692000  | 7.293757000  | 4.560483000  |
| H  | 7.285030000  | 7.802744000  | 4.736933000  |
| C  | 11.597459000 | 11.860682000 | 4.666637000  |
| C  | 14.052689000 | 9.989662000  | 10.133846000 |
| H  | 13.779690000 | 9.302720000  | 10.932945000 |
| C  | 12.387239000 | 13.895396000 | 2.831111000  |
| C  | 11.630657000 | 7.689264000  | 7.412144000  |
| C  | 14.738678000 | 11.765976000 | 8.142315000  |
| C  | 9.601440000  | 8.135294000  | 9.250051000  |
| H  | 8.802158000  | 8.364917000  | 9.948146000  |
| C  | 10.657997000 | 6.121090000  | 4.206217000  |
| H  | 11.658090000 | 5.709110000  | 4.086571000  |
| C  | 10.211879000 | 8.637893000  | 1.484366000  |
| H  | 9.997175000  | 7.907582000  | 2.253022000  |
| C  | 11.383359000 | 9.403203000  | 1.547967000  |
| C  | 9.530782000  | 5.327902000  | 4.115126000  |
| H  | 9.627406000  | 4.263324000  | 3.919517000  |
| C  | 10.815315000 | 12.168039000 | 3.521492000  |
| H  | 9.903271000  | 11.603888000 | 3.338363000  |
| C  | 11.411884000 | 6.771618000  | 8.462786000  |
| H  | 12.043585000 | 5.887928000  | 8.513813000  |
| C  | 16.584211000 | 11.032173000 | 4.179786000  |
| C  | 15.618808000 | 11.113602000 | 3.128313000  |

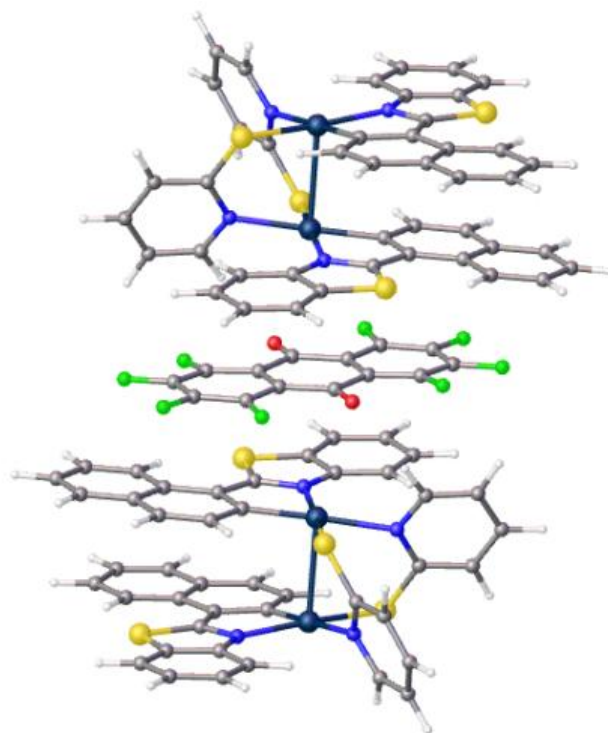

|   |              |              |              |
|---|--------------|--------------|--------------|
| C | 16.368476000 | 10.125575000 | 5.250827000  |
| H | 17.115324000 | 10.072165000 | 6.043644000  |
| C | 15.548863000 | 11.691150000 | 9.274363000  |
| H | 16.417025000 | 12.337992000 | 9.380123000  |
| C | 10.416380000 | 7.005239000  | 9.391177000  |
| H | 10.258369000 | 6.305808000  | 10.211168000 |
| C | 9.341804000  | 8.824186000  | 0.419928000  |
| H | 8.428467000  | 8.233768000  | 0.375842000  |
| C | 8.282717000  | 5.942128000  | 4.285604000  |
| H | 7.364112000  | 5.360077000  | 4.223955000  |
| C | 17.726979000 | 11.865937000 | 4.160302000  |
| H | 18.440474000 | 11.782942000 | 4.980034000  |
| C | 15.196961000 | 10.790313000 | 10.270782000 |
| H | 15.802713000 | 10.719874000 | 11.171951000 |
| C | 9.419844000  | 8.051301000  | 4.642987000  |
| C | 17.937435000 | 12.763483000 | 3.137700000  |
| H | 18.819737000 | 13.401381000 | 3.133126000  |
| C | 16.994695000 | 12.847631000 | 2.095767000  |
| H | 17.140338000 | 13.562021000 | 1.287045000  |
| C | 12.759660000 | 14.902688000 | 1.911045000  |
| H | 12.104644000 | 15.092802000 | 1.061008000  |
| C | 14.402238000 | 14.380141000 | 4.098122000  |
| H | 15.091467000 | 14.198318000 | 4.915366000  |
| C | 15.871339000 | 12.047996000 | 2.093423000  |
| H | 15.168093000 | 12.181844000 | 1.278523000  |
| C | 11.658564000 | 10.312095000 | 0.505378000  |
| C | 14.738875000 | 15.361085000 | 3.189965000  |
| H | 15.662747000 | 15.919852000 | 3.330185000  |
| C | 13.914367000 | 15.632136000 | 2.082012000  |
| H | 14.189575000 | 16.408458000 | 1.370038000  |
| C | 9.616028000  | 9.752657000  | -0.595629000 |
| H | 8.914256000  | 9.881644000  | -1.417553000 |
| C | 10.785850000 | 10.501637000 | -0.565775000 |
| H | 11.019487000 | 11.213412000 | -1.355346000 |
| F | 13.181529000 | 15.801956000 | 6.669147000  |
| F | 8.483642000  | 13.364194000 | 5.657623000  |
| F | 9.397897000  | 15.240610000 | 4.059724000  |
| F | 11.753027000 | 16.461706000 | 4.569378000  |
| O | 13.303857000 | 14.608604000 | 8.949960000  |
| C | 10.269910000 | 13.669833000 | 7.194341000  |
| C | 11.490846000 | 14.326370000 | 7.474399000  |
| C | 12.250293000 | 14.046483000 | 8.718020000  |
| C | 9.591772000  | 13.959435000 | 6.010779000  |
| C | 12.004454000 | 15.231413000 | 6.544789000  |
| C | 11.281313000 | 15.563595000 | 5.400184000  |
| C | 10.079106000 | 14.931438000 | 5.137352000  |
| F | 8.784356000  | 10.898295000 | 10.169398000 |
| F | 13.469975000 | 13.355050000 | 11.191446000 |
| F | 12.561257000 | 11.471722000 | 12.784856000 |
| F | 10.214560000 | 10.239471000 | 12.268650000 |
| O | 8.642324000  | 12.121877000 | 7.906340000  |
| C | 11.687802000 | 13.043134000 | 9.651059000  |

|    |              |              |              |
|----|--------------|--------------|--------------|
| C  | 10.468854000 | 12.383534000 | 9.369058000  |
| C  | 9.703882000  | 12.672062000 | 8.131067000  |
| C  | 12.365731000 | 12.754324000 | 10.834948000 |
| C  | 9.959219000  | 11.472864000 | 10.295303000 |
| C  | 10.682637000 | 11.141337000 | 11.439888000 |
| C  | 11.880915000 | 11.779285000 | 11.706211000 |
| Pt | 10.663842000 | 16.295449000 | 10.838208000 |
| Pt | 9.347270000  | 18.245252000 | 12.411774000 |
| S  | 12.615038000 | 16.996062000 | 11.822810000 |
| S  | 8.883222000  | 19.305697000 | 10.428887000 |
| S  | 6.989616000  | 13.837705000 | 10.084678000 |
| S  | 8.716723000  | 15.621497000 | 15.999600000 |
| N  | 9.000244000  | 15.429486000 | 9.989552000  |
| N  | 11.227689000 | 19.279188000 | 12.331902000 |
| N  | 10.991721000 | 17.895595000 | 9.453465000  |
| N  | 9.508879000  | 17.332595000 | 14.255302000 |
| C  | 7.615569000  | 17.283039000 | 12.476899000 |
| C  | 9.141390000  | 14.100338000 | 11.959288000 |
| C  | 12.007981000 | 17.714533000 | 8.589436000  |
| H  | 12.633089000 | 16.841871000 | 8.772650000  |
| C  | 8.454408000  | 14.480611000 | 10.748255000 |
| C  | 8.509024000  | 16.493490000 | 14.512282000 |
| C  | 7.419039000  | 16.416783000 | 13.573296000 |
| C  | 8.288382000  | 15.684359000 | 8.835333000  |
| C  | 8.611786000  | 16.571604000 | 7.801206000  |
| H  | 9.516455000  | 17.162221000 | 7.852102000  |
| C  | 8.735485000  | 13.075730000 | 12.882585000 |
| C  | 10.767853000 | 13.579715000 | 14.173810000 |
| H  | 11.402063000 | 13.371276000 | 15.035637000 |
| C  | 6.610519000  | 17.326203000 | 11.475625000 |
| H  | 6.746780000  | 17.978815000 | 10.615947000 |
| C  | 13.605542000 | 19.473661000 | 12.197105000 |
| H  | 14.558793000 | 18.979629000 | 12.024367000 |
| C  | 10.322317000 | 14.848425000 | 12.146581000 |
| C  | 7.781460000  | 16.642839000 | 6.692504000  |
| H  | 8.040214000  | 17.320892000 | 5.881226000  |
| C  | 9.583166000  | 12.815207000 | 14.004864000 |
| C  | 10.205770000 | 18.989525000 | 9.350191000  |
| C  | 7.133160000  | 14.884750000 | 8.713058000  |
| C  | 12.240867000 | 18.554638000 | 7.516126000  |
| H  | 13.044384000 | 18.330241000 | 6.821162000  |
| C  | 11.157587000 | 20.606876000 | 12.542966000 |
| H  | 10.150643000 | 21.002609000 | 12.659967000 |
| C  | 11.648412000 | 18.112808000 | 15.283762000 |
| H  | 11.849335000 | 18.843652000 | 14.511823000 |
| C  | 10.488994000 | 17.328943000 | 15.226324000 |
| C  | 12.270814000 | 21.420312000 | 12.626402000 |
| H  | 12.155752000 | 22.484680000 | 12.812958000 |
| C  | 11.120101000 | 14.562521000 | 13.286536000 |
| H  | 12.024483000 | 15.142751000 | 13.456948000 |
| C  | 10.406908000 | 19.896197000 | 8.286439000  |
| H  | 9.759825000  | 20.767975000 | 8.224342000  |



|   |              |              |              |
|---|--------------|--------------|--------------|
| C | 5.289017000  | 15.637300000 | 12.632222000 |
| C | 6.268062000  | 15.559646000 | 13.671375000 |
| C | 5.488543000  | 16.543316000 | 11.557699000 |
| H | 4.732716000  | 16.592232000 | 10.773131000 |
| C | 6.302208000  | 14.948819000 | 7.595496000  |
| H | 5.432707000  | 14.300566000 | 7.511476000  |
| C | 11.405076000 | 19.667426000 | 7.359859000  |
| H | 11.549642000 | 20.357983000 | 6.529926000  |
| C | 12.524236000 | 17.943978000 | 16.346381000 |
| H | 13.428451000 | 18.548593000 | 16.385781000 |
| C | 13.529280000 | 20.826448000 | 12.460251000 |
| H | 14.437681000 | 21.424854000 | 12.516051000 |
| C | 4.150243000  | 14.798581000 | 12.665761000 |
| H | 3.425330000  | 14.879835000 | 11.855929000 |
| C | 6.634682000  | 15.841176000 | 6.585084000  |
| H | 6.011673000  | 15.903728000 | 5.695142000  |
| C | 12.428657000 | 18.694825000 | 12.121905000 |
| C | 3.958242000  | 13.897545000 | 13.688915000 |
| H | 3.078995000  | 13.255614000 | 13.704246000 |
| C | 4.916749000  | 13.813874000 | 14.716452000 |
| H | 4.786893000  | 13.095111000 | 15.523996000 |
| C | 9.236462000  | 11.808334000 | 14.935358000 |
| H | 9.903067000  | 11.634498000 | 15.779860000 |
| C | 7.564259000  | 12.288394000 | 12.761046000 |
| H | 6.865909000  | 12.450919000 | 11.947500000 |
| C | 6.035889000  | 14.619440000 | 14.705770000 |
| H | 6.753217000  | 14.484217000 | 15.508176000 |
| C | 10.230087000 | 16.420547000 | 16.273484000 |
| C | 7.252408000  | 11.308842000 | 13.679558000 |
| H | 6.337042000  | 10.733281000 | 13.551889000 |
| C | 8.091790000  | 11.059519000 | 14.781413000 |
| H | 7.836479000  | 10.283782000 | 15.501384000 |
| C | 12.267036000 | 17.015311000 | 17.366236000 |
| H | 12.973025000 | 16.900255000 | 18.186614000 |
| C | 11.108577000 | 16.248624000 | 17.342871000 |
| H | 10.887956000 | 15.536672000 | 18.136015000 |

## Cartesian coordinates for [1·C<sub>6</sub>F<sub>6</sub>] (in Å)

|    |              |              |              |
|----|--------------|--------------|--------------|
| Pt | 0.201293000  | -0.425328000 | 7.187428000  |
| S  | -1.728753000 | -0.498056000 | 10.153437000 |
| S  | 0.615546000  | -4.886000000 | 7.089617000  |
| N  | -0.180881000 | -2.445801000 | 7.096969000  |
| N  | -1.762626000 | 0.327308000  | 7.560697000  |
| C  | -2.353705000 | 0.922349000  | 6.506946000  |
| H  | -1.749662000 | 0.971657000  | 5.604239000  |
| C  | 2.022310000  | -1.102859000 | 6.812599000  |
| C  | -1.328553000 | -3.197458000 | 7.235508000  |
| C  | 2.177611000  | -2.504473000 | 6.785666000  |
| C  | 0.921820000  | -3.183226000 | 6.990697000  |
| C  | 3.449342000  | -3.125845000 | 6.533758000  |
| C  | -3.643561000 | 1.415387000  | 6.545276000  |
| H  | -4.077123000 | 1.872351000  | 5.659755000  |
| C  | 4.570280000  | -2.273805000 | 6.286705000  |
| C  | -2.650010000 | -2.741759000 | 7.314011000  |
| H  | -2.864219000 | -1.683333000 | 7.246270000  |
| C  | -3.735660000 | 0.736083000  | 8.843814000  |
| H  | -4.237575000 | 0.661878000  | 9.805630000  |
| C  | 5.843930000  | -2.832520000 | 6.029619000  |
| H  | 6.676832000  | -2.154953000 | 5.842949000  |
| C  | -1.080856000 | -4.584734000 | 7.270572000  |
| C  | -2.413343000 | 0.250152000  | 8.742677000  |
| C  | 4.391738000  | -0.866619000 | 6.316881000  |
| H  | 5.256243000  | -0.229063000 | 6.129991000  |
| C  | -3.671716000 | -3.667812000 | 7.462704000  |
| H  | -4.699198000 | -3.314678000 | 7.528384000  |
| C  | -3.407792000 | -5.044822000 | 7.526704000  |
| H  | -4.228668000 | -5.749309000 | 7.647340000  |
| C  | 3.171870000  | -0.302267000 | 6.584425000  |
| H  | 3.079523000  | 0.781008000  | 6.622338000  |
| C  | -2.105786000 | -5.517865000 | 7.422203000  |
| H  | -1.889156000 | -6.583985000 | 7.452372000  |
| C  | 6.033374000  | -4.195657000 | 6.013972000  |
| H  | 7.017566000  | -4.616147000 | 5.814435000  |
| C  | -4.353111000 | 1.305498000  | 7.747998000  |
| H  | -5.372617000 | 1.680468000  | 7.828244000  |
| C  | 3.683914000  | -4.522659000 | 6.508761000  |
| H  | 2.882411000  | -5.225650000 | 6.706791000  |
| C  | 4.935490000  | -5.043083000 | 6.256934000  |
| H  | 5.071574000  | -6.123435000 | 6.254153000  |
| Pt | 0.549241000  | -0.274537000 | 9.990837000  |
| S  | 0.814858000  | 1.782214000  | 7.105214000  |
| S  | 4.856764000  | -1.470565000 | 9.713849000  |
| N  | 2.605996000  | -0.258178000 | 9.964072000  |
| N  | 0.143661000  | 1.814120000  | 9.739547000  |
| C  | -0.278211000 | 2.444567000  | 10.852046000 |
| H  | -0.410025000 | 1.804561000  | 11.722205000 |
| C  | 0.912614000  | -2.204434000 | 10.236106000 |

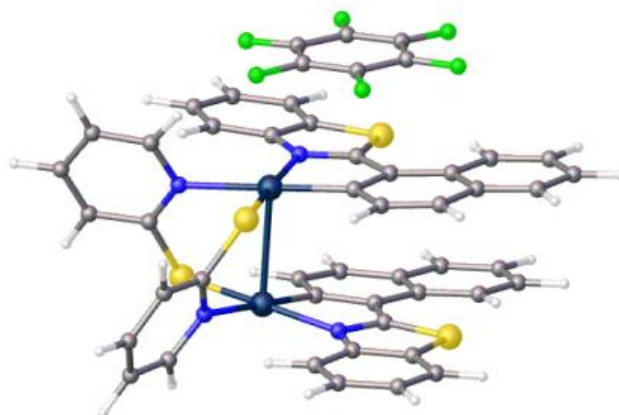

|   |              |              |              |
|---|--------------|--------------|--------------|
| C | 3.540917000  | 0.746208000  | 9.821832000  |
| C | 2.257356000  | -2.609023000 | 10.098121000 |
| C | 3.135556000  | -1.478440000 | 9.933486000  |
| C | 2.643346000  | -3.993699000 | 10.120452000 |
| C | -0.514459000 | 3.804213000  | 10.909217000 |
| H | -0.839759000 | 4.262461000  | 11.839331000 |
| C | 1.626181000  | -4.964562000 | 10.381007000 |
| C | 3.328686000  | 2.130413000  | 9.847858000  |
| H | 2.334949000  | 2.524604000  | 10.016211000 |
| C | 0.063119000  | 3.904129000  | 8.583388000  |
| H | 0.187702000  | 4.439604000  | 7.645135000  |
| C | 1.950965000  | -6.341039000 | 10.412115000 |
| H | 1.153843000  | -7.055543000 | 10.617287000 |
| C | 4.854345000  | 0.261864000  | 9.652299000  |
| C | 0.289263000  | 2.509183000  | 8.589837000  |
| C | 0.286421000  | -4.532354000 | 10.562202000 |
| H | -0.480280000 | -5.284389000 | 10.751572000 |
| C | 4.409626000  | 2.980893000  | 9.665953000  |
| H | 4.243299000  | 4.056493000  | 9.679171000  |
| C | 5.706644000  | 2.483418000  | 9.467989000  |
| H | 6.536156000  | 3.173019000  | 9.322969000  |
| C | -0.062125000 | -3.209648000 | 10.467863000 |
| H | -1.107942000 | -2.924094000 | 10.559032000 |
| C | 5.942554000  | 1.114138000  | 9.468653000  |
| H | 6.945893000  | 0.714986000  | 9.332457000  |
| C | 3.236203000  | -6.775327000 | 10.177051000 |
| H | 3.474843000  | -7.837376000 | 10.198845000 |
| C | -0.324377000 | 4.551492000  | 9.739048000  |
| H | -0.498637000 | 5.626650000  | 9.731754000  |
| C | 3.950537000  | -4.479825000 | 9.869754000  |
| H | 4.756001000  | -3.801647000 | 9.607734000  |
| C | 4.239436000  | -5.828310000 | 9.895983000  |
| H | 5.254413000  | -6.158578000 | 9.680489000  |
| F | 2.332777000  | -4.036938000 | 3.598858000  |
| F | -0.314896000 | -3.818404000 | 4.127045000  |
| F | -1.460361000 | -1.375853000 | 4.308226000  |
| C | 1.772981000  | -2.848674000 | 3.666588000  |
| C | 0.410890000  | -2.737029000 | 3.931672000  |
| C | -0.178607000 | -1.482903000 | 4.019764000  |
| F | 3.835727000  | -1.805810000 | 3.273145000  |
| F | 2.692521000  | 0.637013000  | 3.509680000  |
| F | 0.038418000  | 0.851006000  | 3.980454000  |
| C | 2.545212000  | -1.703408000 | 3.503682000  |
| C | 1.956052000  | -0.447089000 | 3.610885000  |
| C | 0.593031000  | -0.339029000 | 3.857384000  |

Cartesian coordinates for [1·C<sub>6</sub>F<sub>6</sub>·1] (in Å)

|    |              |              |              |
|----|--------------|--------------|--------------|
| Pt | 1.920502000  | 1.585118000  | -2.891887000 |
| S  | 3.916939000  | 3.362873000  | -5.235467000 |
| S  | 4.321765000  | -2.199537000 | -3.170131000 |
| N  | 3.446226000  | 0.194361000  | -2.871340000 |
| N  | 3.033055000  | 3.404460000  | -2.661877000 |
| C  | 2.964435000  | 3.954927000  | -1.435432000 |
| H  | 2.345591000  | 3.417833000  | -0.720187000 |
| C  | 0.871651000  | -0.088675000 | -3.062063000 |
| C  | 4.815398000  | 0.297524000  | -2.757116000 |
| C  | 1.607680000  | -1.287740000 | -3.166474000 |
| C  | 3.026544000  | -1.050545000 | -3.081494000 |
| C  | 0.965978000  | -2.566791000 | -3.304122000 |
| C  | 3.656950000  | 5.094443000  | -1.076278000 |
| H  | 3.579724000  | 5.472601000  | -0.059480000 |
| C  | -0.463699000 | -2.598103000 | -3.307256000 |
| C  | 5.571126000  | 1.445112000  | -2.490974000 |
| H  | 5.075554000  | 2.393360000  | -2.325554000 |
| C  | 4.490421000  | 5.176869000  | -3.324176000 |
| H  | 5.066848000  | 5.642866000  | -4.120928000 |
| C  | -1.146632000 | -3.829164000 | -3.438675000 |
| H  | -2.237174000 | -3.817320000 | -3.433243000 |
| C  | 5.479100000  | -0.935881000 | -2.916223000 |
| C  | 3.759171000  | 4.007147000  | -3.629237000 |
| C  | -1.184348000 | -1.379954000 | -3.199793000 |
| H  | -2.274706000 | -1.418416000 | -3.205018000 |
| C  | 6.952789000  | 1.340197000  | -2.428411000 |
| H  | 7.541681000  | 2.233507000  | -2.224480000 |
| C  | 7.602561000  | 0.110963000  | -2.618960000 |
| H  | 8.689212000  | 0.057381000  | -2.567164000 |
| C  | -0.544709000 | -0.172367000 | -3.099243000 |
| H  | -1.131256000 | 0.743009000  | -3.043109000 |
| C  | 6.867653000  | -1.043724000 | -2.858598000 |
| H  | 7.358059000  | -2.006744000 | -2.993857000 |
| C  | -0.459078000 | -5.014632000 | -3.568282000 |
| H  | -0.994368000 | -5.958526000 | -3.665923000 |
| C  | 4.449666000  | 5.712439000  | -2.051598000 |
| H  | 5.012580000  | 6.616970000  | -1.820921000 |
| C  | 1.637669000  | -3.806172000 | -3.439692000 |
| H  | 2.721357000  | -3.853558000 | -3.463311000 |
| C  | 0.948394000  | -4.993314000 | -3.571874000 |
| H  | 1.506575000  | -5.922398000 | -3.684290000 |
| Pt | 2.003621000  | 2.156831000  | -5.659013000 |
| S  | 0.075121000  | 2.948771000  | -2.763151000 |
| S  | -0.625070000 | -1.345921000 | -6.633502000 |
| N  | 0.400833000  | 0.966520000  | -6.190496000 |
| N  | 0.966138000  | 3.971750000  | -5.121543000 |
| C  | 1.066203000  | 4.966790000  | -6.023465000 |
| H  | 1.703169000  | 4.747818000  | -6.879124000 |
| C  | 2.954686000  | 0.480506000  | -6.154075000 |

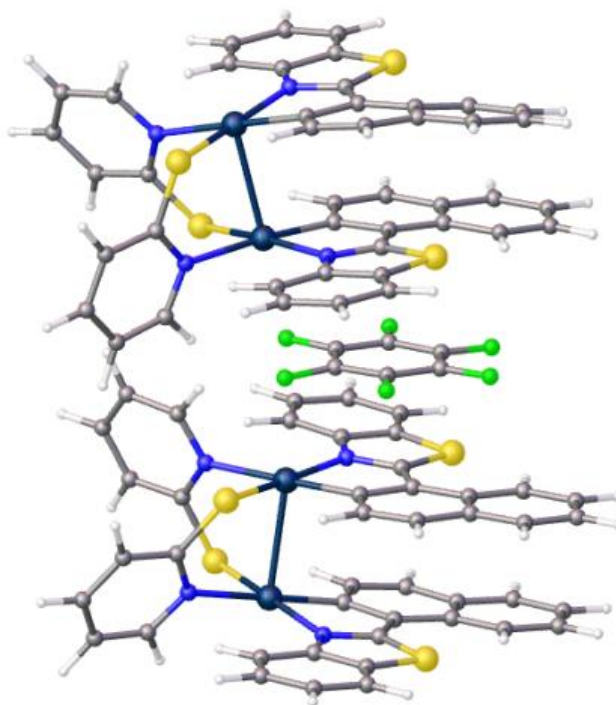

|    |              |              |              |
|----|--------------|--------------|--------------|
| C  | -0.961370000 | 1.177060000  | -6.213591000 |
| C  | 2.142259000  | -0.644322000 | -6.412448000 |
| C  | 0.742273000  | -0.302807000 | -6.400605000 |
| C  | 2.698497000  | -1.953243000 | -6.622685000 |
| C  | 0.407433000  | 6.174010000  | -5.897406000 |
| H  | 0.514601000  | 6.936755000  | -6.664981000 |
| C  | 4.123029000  | -2.077120000 | -6.644538000 |
| C  | -1.647613000 | 2.389350000  | -6.066868000 |
| H  | -1.095877000 | 3.312507000  | -5.939126000 |
| C  | -0.454438000 | 5.372911000  | -3.807789000 |
| H  | -1.030768000 | 5.495961000  | -2.892870000 |
| C  | 4.722608000  | -3.343992000 | -6.834502000 |
| H  | 5.811705000  | -3.402450000 | -6.848810000 |
| C  | -1.702131000 | -0.003035000 | -6.431662000 |
| C  | 0.246106000  | 4.158671000  | -3.993588000 |
| C  | 4.921972000  | -0.924518000 | -6.425094000 |
| H  | 6.007507000  | -1.036455000 | -6.431521000 |
| C  | -3.034519000 | 2.386377000  | -6.100864000 |
| H  | -3.568123000 | 3.328417000  | -5.981371000 |
| C  | -3.759023000 | 1.199268000  | -6.287752000 |
| H  | -4.847728000 | 1.224702000  | -6.306646000 |
| C  | 4.362552000  | 0.300341000  | -6.168959000 |
| H  | 5.007624000  | 1.149033000  | -5.948388000 |
| C  | -3.096006000 | -0.009141000 | -6.463712000 |
| H  | -3.645658000 | -0.935956000 | -6.622242000 |
| C  | 3.958130000  | -4.479346000 | -6.983871000 |
| H  | 4.429909000  | -5.450816000 | -7.127961000 |
| C  | -0.385608000 | 6.370305000  | -4.758456000 |
| H  | -0.925071000 | 7.305922000  | -4.611013000 |
| C  | 1.946452000  | -3.144990000 | -6.768231000 |
| H  | 0.862262000  | -3.132086000 | -6.712328000 |
| C  | 2.555140000  | -4.370720000 | -6.941258000 |
| H  | 1.936637000  | -5.263659000 | -7.027556000 |
| F  | 2.653615000  | -3.299663000 | -0.279104000 |
| F  | 4.047470000  | -0.986618000 | -0.015250000 |
| F  | 2.733556000  | 1.354858000  | 0.239717000  |
| C  | 2.016885000  | -2.156538000 | -0.146477000 |
| C  | 2.730644000  | -0.971257000 | -0.013526000 |
| C  | 2.052955000  | 0.234590000  | 0.093362000  |
| F  | -0.048470000 | -3.261979000 | -0.221654000 |
| F  | -1.365048000 | -0.899003000 | -0.027245000 |
| F  | 0.024811000  | 1.412203000  | 0.050748000  |
| C  | 0.626225000  | -2.135541000 | -0.132550000 |
| C  | -0.048705000 | -0.925501000 | -0.032400000 |
| C  | 0.667176000  | 0.260395000  | 0.052588000  |
| Pt | 0.865768000  | 1.688234000  | 3.158165000  |
| S  | -1.087040000 | 3.462728000  | 5.634691000  |
| S  | -1.339846000 | -2.224469000 | 3.045215000  |
| N  | -0.595179000 | 0.235437000  | 3.029474000  |
| N  | -0.324836000 | 3.482116000  | 3.015462000  |
| C  | -0.325488000 | 4.029569000  | 1.785165000  |
| H  | 0.260661000  | 3.496428000  | 1.039763000  |

|    |              |              |             |
|----|--------------|--------------|-------------|
| C  | 1.993663000  | 0.061975000  | 3.112146000 |
| C  | -1.973160000 | 0.277224000  | 3.018840000 |
| C  | 1.320810000  | -1.176272000 | 3.030373000 |
| C  | -0.108319000 | -1.003204000 | 3.027660000 |
| C  | 2.031301000  | -2.420953000 | 2.911027000 |
| C  | -1.036524000 | 5.167097000  | 1.458060000 |
| H  | -1.009968000 | 5.545430000  | 0.438856000 |
| C  | 3.460550000  | -2.377247000 | 2.927177000 |
| C  | -2.796062000 | 1.407689000  | 2.986948000 |
| H  | -2.355632000 | 2.395375000  | 2.943053000 |
| C  | -1.750401000 | 5.257707000  | 3.744489000 |
| H  | -2.284591000 | 5.726393000  | 4.568717000 |
| C  | 4.209277000  | -3.571173000 | 2.803910000 |
| H  | 5.297417000  | -3.502250000 | 2.829240000 |
| C  | -2.567622000 | -1.000976000 | 3.037758000 |
| C  | -1.004209000 | 4.087991000  | 4.016188000 |
| C  | 4.114261000  | -1.126319000 | 3.075942000 |
| H  | 5.204957000  | -1.109574000 | 3.102992000 |
| C  | -4.173067000 | 1.237661000  | 3.001209000 |
| H  | -4.814112000 | 2.118010000  | 2.979678000 |
| C  | -4.751655000 | -0.039966000 | 3.039093000 |
| H  | -5.835713000 | -0.145189000 | 3.050495000 |
| C  | 3.411784000  | 0.046321000  | 3.163511000 |
| H  | 3.946989000  | 0.987518000  | 3.273676000 |
| C  | -3.949915000 | -1.175380000 | 3.051734000 |
| H  | -4.384971000 | -2.173578000 | 3.073056000 |
| C  | 3.588318000  | -4.790047000 | 2.655596000 |
| H  | 4.174380000  | -5.702916000 | 2.556250000 |
| C  | -1.776903000 | 5.789562000  | 2.470959000 |
| H  | -2.350910000 | 6.693606000  | 2.267370000 |
| C  | 1.428326000  | -3.694494000 | 2.754430000 |
| H  | 0.349563000  | -3.796644000 | 2.698495000 |
| C  | 2.181712000  | -4.842607000 | 2.629253000 |
| H  | 1.675909000  | -5.798007000 | 2.492114000 |
| Pt | 0.774333000  | 2.154912000  | 5.917341000 |
| S  | 2.659074000  | 3.122944000  | 3.050259000 |
| S  | 3.269974000  | -1.526954000 | 6.439139000 |
| N  | 2.335110000  | 0.860173000  | 6.277581000 |
| N  | 1.866742000  | 3.959041000  | 5.514327000 |
| C  | 1.827474000  | 4.872163000  | 6.503847000 |
| H  | 1.206245000  | 4.599252000  | 7.355617000 |
| C  | -0.235176000 | 0.484422000  | 6.262463000 |
| C  | 3.700521000  | 1.018129000  | 6.357055000 |
| C  | 0.534492000  | -0.697045000 | 6.282183000 |
| C  | 1.946993000  | -0.411857000 | 6.303990000 |
| C  | -0.074486000 | -1.997170000 | 6.270272000 |
| C  | 2.524971000  | 6.062977000  | 6.465597000 |
| H  | 2.466225000  | 6.756952000  | 7.300669000 |
| C  | -1.495610000 | -2.067738000 | 6.418809000 |
| C  | 4.426503000  | 2.215711000  | 6.363112000 |
| H  | 3.905551000  | 3.165603000  | 6.322430000 |
| C  | 3.295775000  | 5.426429000  | 4.285675000 |

|   |              |              |             |
|---|--------------|--------------|-------------|
| H | 3.851265000  | 5.611825000  | 3.368343000 |
| C | -2.146051000 | -3.323551000 | 6.398483000 |
| H | -3.229651000 | -3.346686000 | 6.521253000 |
| C | 4.395685000  | -0.205969000 | 6.444149000 |
| C | 2.561174000  | 4.221366000  | 4.386925000 |
| C | -2.242629000 | -0.863894000 | 6.506474000 |
| H | -3.325889000 | -0.932608000 | 6.618711000 |
| C | 5.811585000  | 2.160370000  | 6.426326000 |
| H | 6.378825000  | 3.090282000  | 6.425607000 |
| C | 6.492161000  | 0.934681000  | 6.489994000 |
| H | 7.580247000  | 0.919853000  | 6.536113000 |
| C | -1.642525000 | 0.363561000  | 6.388892000 |
| H | -2.255623000 | 1.262902000  | 6.379134000 |
| C | 5.786983000  | -0.263152000 | 6.505053000 |
| H | 6.303629000  | -1.220386000 | 6.560230000 |
| C | -1.440194000 | -4.486924000 | 6.187812000 |
| H | -1.952856000 | -5.447867000 | 6.158063000 |
| C | 3.289763000  | 6.335832000  | 5.322394000 |
| H | 3.858441000  | 7.262227000  | 5.241669000 |
| C | 0.613974000  | -3.210543000 | 6.024324000 |
| H | 1.677779000  | -3.208945000 | 5.802447000 |
| C | -0.049668000 | -4.419307000 | 5.976146000 |
| H | 0.513557000  | -5.326490000 | 5.758858000 |

## Cartesian coordinates for [2·C<sub>6</sub>F<sub>6</sub>] (in Å)

|    |              |              |               |
|----|--------------|--------------|---------------|
| Pt | 2.148326000  | -1.733597000 | -9.606171000  |
| S  | 4.471488000  | -2.923203000 | -11.982574000 |
| S  | 0.130269000  | -5.736624000 | -9.390396000  |
| N  | 1.773103000  | -3.753940000 | -9.312663000  |
| N  | 4.280792000  | -1.762140000 | -9.527964000  |
| C  | -0.451276000 | -2.977950000 | -9.617178000  |
| C  | 0.163498000  | -1.700312000 | -9.676013000  |
| C  | 0.492794000  | -4.050680000 | -9.459266000  |
| C  | 1.815344000  | -6.076492000 | -9.133925000  |
| C  | 4.825884000  | -1.249483000 | -8.408273000  |
| H  | 4.117477000  | -0.838888000 | -7.693916000  |
| C  | 2.554482000  | -4.873360000 | -9.107904000  |
| C  | 3.931195000  | -4.921656000 | -8.863436000  |
| H  | 4.502473000  | -4.003740000 | -8.802632000  |
| C  | 2.425049000  | -7.318537000 | -8.961613000  |
| H  | 1.840814000  | -8.236222000 | -8.990894000  |
| C  | 6.184280000  | -1.259196000 | -8.156737000  |
| H  | 6.567472000  | -0.844875000 | -7.228042000  |
| C  | 5.081275000  | -2.255747000 | -10.499122000 |
| C  | 6.478925000  | -2.296877000 | -10.298287000 |
| H  | 7.099751000  | -2.701430000 | -11.094230000 |
| C  | 4.537585000  | -6.156917000 | -8.688589000  |
| H  | 5.609109000  | -6.199221000 | -8.502356000  |
| C  | -0.700319000 | -0.599579000 | -9.790320000  |
| H  | -0.283809000 | 0.404044000  | -9.860561000  |
| C  | -2.083412000 | -0.766682000 | -9.813153000  |
| H  | -2.723084000 | 0.112605000  | -9.885411000  |
| C  | 3.797459000  | -7.347892000 | -8.745344000  |
| H  | 4.299103000  | -8.304137000 | -8.608570000  |
| C  | 7.028303000  | -1.812607000 | -9.127939000  |
| H  | 8.106380000  | -1.844090000 | -8.975506000  |
| C  | -2.662926000 | -2.039254000 | -9.743565000  |
| H  | -3.744940000 | -2.153872000 | -9.759654000  |
| C  | -1.841185000 | -3.152501000 | -9.654533000  |
| H  | -2.270325000 | -4.152943000 | -9.596245000  |
| Pt | 2.477844000  | -1.889994000 | -12.412589000 |
| S  | 2.334724000  | 0.533870000  | -9.810894000  |
| S  | -1.913760000 | -1.538752000 | -13.263620000 |
| N  | 0.613061000  | -1.144268000 | -12.937807000 |
| N  | 3.536892000  | -0.043038000 | -12.180881000 |
| C  | 0.124956000  | -3.471077000 | -12.937487000 |
| C  | 1.510888000  | -3.607095000 | -12.662437000 |
| C  | -0.294973000 | -2.100307000 | -13.036225000 |
| C  | -1.337981000 | 0.101035000  | -13.225642000 |
| C  | 4.388894000  | 0.243829000  | -13.182915000 |
| H  | 4.470768000  | -0.522900000 | -13.950847000 |
| C  | 0.064037000  | 0.118561000  | -13.053859000 |
| C  | 0.731553000  | 1.348388000  | -13.037035000 |
| H  | 1.809655000  | 1.378454000  | -12.942541000 |

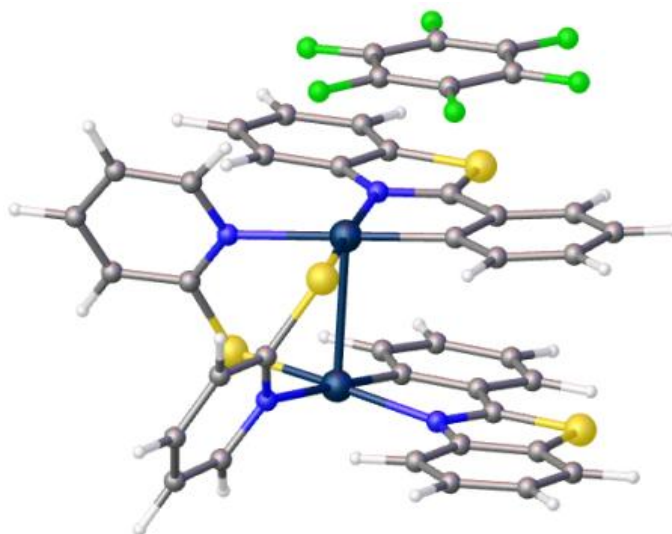



|   |              |              |               |
|---|--------------|--------------|---------------|
| C | -2.082292000 | 1.274350000  | -13.340430000 |
| H | -3.162922000 | 1.239487000  | -13.464512000 |
| C | 5.102993000  | 1.424145000  | -13.257127000 |
| H | 5.766596000  | 1.607820000  | -14.097873000 |
| C | 3.401198000  | 0.820731000  | -11.149658000 |
| C | 4.103731000  | 2.046516000  | -11.167621000 |
| H | 3.976625000  | 2.722804000  | -10.325526000 |
| C | -0.008031000 | 2.516789000  | -13.152465000 |
| H | 0.509067000  | 3.474318000  | -13.132727000 |
| C | 1.994500000  | -4.920221000 | -12.548433000 |
| H | 3.044341000  | -5.086727000 | -12.312443000 |
| C | 1.152030000  | -6.017805000 | -12.714852000 |
| H | 1.565169000  | -7.022335000 | -12.622679000 |
| C | -1.403438000 | 2.486188000  | -13.294059000 |
| H | -1.960336000 | 3.417650000  | -13.377616000 |
| C | 4.940938000  | 2.353581000  | -12.221424000 |
| H | 5.482462000  | 3.298588000  | -12.232620000 |
| C | -0.212556000 | -5.853911000 | -12.982984000 |
| H | -0.860068000 | -6.720809000 | -13.100760000 |
| C | -0.730067000 | -4.571505000 | -13.088080000 |
| H | -1.791269000 | -4.418700000 | -13.288104000 |
| F | 0.712792000  | -4.502177000 | -6.376810000  |
| F | 2.768880000  | -2.746188000 | -6.354999000  |
| C | 0.471329000  | -3.207652000 | -6.410701000  |
| C | 1.527105000  | -2.306079000 | -6.394405000  |
| F | 2.282388000  | -0.088908000 | -6.496875000  |
| F | -1.837328000 | -3.600321000 | -6.523683000  |
| F | -2.323973000 | -0.938842000 | -6.669828000  |
| F | -0.258907000 | 0.809628000  | -6.710698000  |
| C | -0.838061000 | -2.743878000 | -6.493967000  |
| C | 1.276589000  | -0.941866000 | -6.474506000  |
| C | -1.088455000 | -1.378710000 | -6.574295000  |
| C | -0.028263000 | -0.477445000 | -6.576864000  |

### Cartesian coordinates for $[2 \cdot C_6F_6 \cdot 2]$ (in Å)

|    |             |             |             |
|----|-------------|-------------|-------------|
| Pt | 5.232705000 | 4.093024000 | 4.326219000 |
| S  | 8.193486000 | 5.221721000 | 5.915677000 |
| S  | 5.525096000 | 0.055493000 | 6.264188000 |
| F  | 2.455152000 | 1.230936000 | 6.379352000 |
| F  | 2.422202000 | 3.934373000 | 6.374899000 |
| N  | 5.323569000 | 2.567487000 | 5.730790000 |
| N  | 5.540893000 | 5.765635000 | 5.619215000 |
| C  | 5.026501000 | 1.273944000 | 3.760526000 |
| C  | 4.920617000 | 2.539805000 | 3.128320000 |
| C  | 5.290495000 | 1.369952000 | 5.170743000 |
| C  | 2.167238000 | 1.882198000 | 5.270466000 |
| C  | 5.657693000 | 1.186056000 | 7.576943000 |
| C  | 4.440969000 | 6.497577000 | 5.881078000 |
| H  | 3.539148000 | 6.186407000 | 5.361284000 |
| C  | 5.509799000 | 2.506420000 | 7.097321000 |
| C  | 5.535891000 | 3.569502000 | 8.006418000 |

|    |             |              |              |
|----|-------------|--------------|--------------|
| H  | 5.384238000 | 4.583650000  | 7.659039000  |
| C  | 5.870056000 | 0.912332000  | 8.927448000  |
| H  | 5.988787000 | -0.111307000 | 9.277439000  |
| C  | 4.430376000 | 7.554605000  | 6.770389000  |
| H  | 3.506933000 | 8.096623000  | 6.955825000  |
| C  | 6.720157000 | 6.099256000  | 6.189980000  |
| C  | 6.772476000 | 7.170586000  | 7.109741000  |
| H  | 7.733059000 | 7.415745000  | 7.556744000  |
| C  | 5.742880000 | 3.297270000  | 9.350857000  |
| H  | 5.767084000 | 4.122596000  | 10.060006000 |
| C  | 2.158263000 | 3.270080000  | 5.267559000  |
| C  | 4.612776000 | 2.527548000  | 1.759071000  |
| H  | 4.538565000 | 3.469243000  | 1.217370000  |
| C  | 4.391833000 | 1.331701000  | 1.078863000  |
| H  | 4.132436000 | 1.362809000  | 0.020971000  |
| C  | 5.917699000 | 1.983297000  | 9.811564000  |
| H  | 6.081586000 | 1.797916000  | 10.871563000 |
| C  | 5.631471000 | 7.887463000  | 7.409479000  |
| H  | 5.674176000 | 8.711707000  | 8.120384000  |
| C  | 4.492632000 | 0.096990000  | 1.730588000  |
| H  | 4.312114000 | -0.829140000 | 1.188510000  |
| C  | 4.823342000 | 0.067668000  | 3.077070000  |
| H  | 4.900578000 | -0.882311000 | 3.606278000  |
| F  | 1.885153000 | 5.280743000  | 4.091093000  |
| F  | 1.888630000 | -0.133775000 | 4.105779000  |
| F  | 1.319241000 | 1.217896000  | 1.825336000  |
| F  | 1.352925000 | 3.921283000  | 1.814530000  |
| C  | 1.887511000 | 1.183742000  | 4.102429000  |
| C  | 1.886140000 | 3.957203000  | 4.094960000  |
| C  | 1.607003000 | 1.875446000  | 2.930514000  |
| C  | 1.614977000 | 3.263101000  | 2.926040000  |
| Pt | 8.021214000 | 4.236659000  | 3.859920000  |
| S  | 4.971983000 | 5.621018000  | 2.647258000  |
| S  | 7.905301000 | 0.916486000  | 0.846559000  |
| N  | 8.014214000 | 3.182208000  | 2.071629000  |
| N  | 7.590100000 | 6.195500000  | 3.108663000  |
| C  | 8.431070000 | 1.395925000  | 3.583466000  |
| C  | 8.459900000 | 2.428742000  | 4.557020000  |
| C  | 8.138629000 | 1.879807000  | 2.262442000  |
| C  | 7.622382000 | 2.361945000  | -0.076196000 |
| C  | 8.644547000 | 7.032199000  | 3.090698000  |
| H  | 9.561369000 | 6.625048000  | 3.512669000  |
| C  | 7.736235000 | 3.498011000  | 0.755659000  |
| C  | 7.583780000 | 4.770568000  | 0.194003000  |
| H  | 7.706981000 | 5.652796000  | 0.809492000  |
| C  | 7.322664000 | 2.468555000  | -1.433570000 |
| H  | 7.231329000 | 1.580501000  | -2.055978000 |
| C  | 8.591725000 | 8.308778000  | 2.565370000  |
| H  | 9.479473000 | 8.935543000  | 2.565187000  |
| C  | 6.389206000 | 6.621442000  | 2.656217000  |
| C  | 6.270853000 | 7.917285000  | 2.104462000  |
| H  | 5.294097000 | 8.234751000  | 1.746991000  |

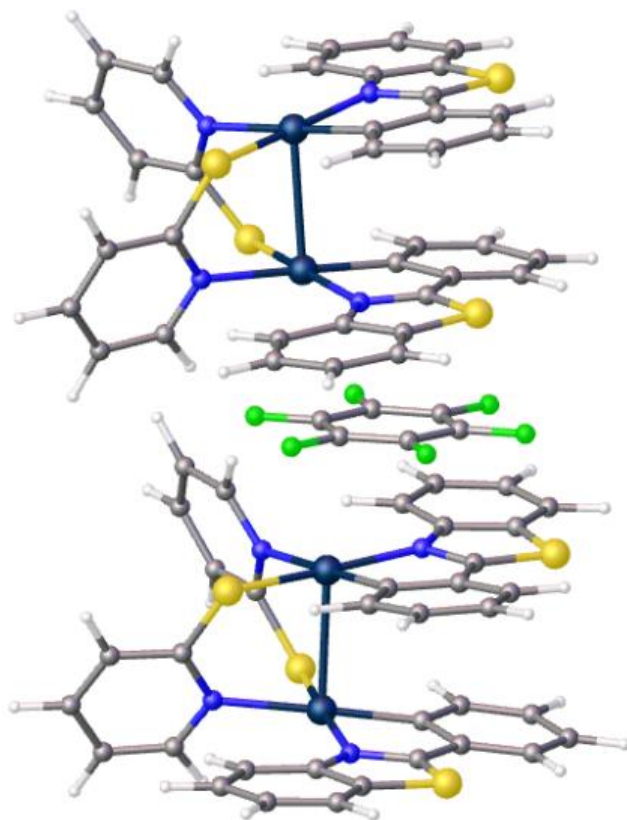

|    |              |              |              |
|----|--------------|--------------|--------------|
| C  | 7.285607000  | 4.877822000  | -1.156990000 |
| H  | 7.158690000  | 5.866551000  | -1.594001000 |
| C  | 8.739596000  | 2.031264000  | 5.874171000  |
| H  | 8.749169000  | 2.776367000  | 6.668002000  |
| C  | 8.987791000  | 0.696638000  | 6.189446000  |
| H  | 9.203651000  | 0.426978000  | 7.223379000  |
| C  | 7.146282000  | 3.740197000  | -1.966025000 |
| H  | 6.907684000  | 3.852146000  | -3.022105000 |
| C  | 7.367800000  | 8.752935000  | 2.047650000  |
| H  | 7.273505000  | 9.751776000  | 1.623547000  |
| C  | 8.951096000  | -0.301900000 | 5.208417000  |
| H  | 9.137567000  | -1.341439000 | 5.471739000  |
| C  | 8.663860000  | 0.050015000  | 3.898064000  |
| H  | 8.621989000  | -0.711292000 | 3.118148000  |
| Pt | -1.465545000 | 4.072038000  | 3.837660000  |
| S  | -4.429690000 | 5.214716000  | 2.260502000  |
| S  | -1.754548000 | 0.031149000  | 1.906182000  |
| N  | -1.558570000 | 2.544180000  | 2.436623000  |
| N  | -1.772299000 | 5.743525000  | 2.542472000  |
| C  | -1.256222000 | 1.253856000  | 4.408089000  |
| C  | -1.153144000 | 2.520988000  | 5.038440000  |
| C  | -1.521268000 | 1.347389000  | 2.997895000  |
| C  | -1.893530000 | 1.160085000  | 0.592643000  |
| C  | -0.669376000 | 6.468553000  | 2.274339000  |
| H  | 0.236613000  | 6.139894000  | 2.775564000  |
| C  | -1.749254000 | 2.481389000  | 1.070789000  |
| C  | -1.785028000 | 3.543889000  | 0.161345000  |
| H  | -1.638909000 | 4.559088000  | 0.507992000  |
| C  | -2.109553000 | 0.884513000  | -0.756884000 |
| H  | -2.225268000 | -0.139860000 | -1.105709000 |
| C  | -0.660459000 | 7.535223000  | 1.396566000  |
| H  | 0.265377000  | 8.071161000  | 1.205611000  |
| C  | -2.954557000 | 6.089701000  | 1.985550000  |
| C  | -3.008837000 | 7.171614000  | 1.078494000  |
| H  | -3.972150000 | 7.427973000  | 0.643833000  |
| C  | -1.995939000 | 3.269815000  | -1.182152000 |
| H  | -2.027841000 | 4.094631000  | -1.891583000 |
| C  | -0.846267000 | 2.511311000  | 6.407864000  |
| H  | -0.774040000 | 3.454023000  | 6.948076000  |
| C  | -0.623576000 | 1.316906000  | 7.090152000  |
| H  | -0.365048000 | 1.350253000  | 8.148185000  |
| C  | -2.165487000 | 1.954698000  | -1.641486000 |
| H  | -2.332562000 | 1.767887000  | -2.700738000 |
| C  | -1.866225000 | 7.884772000  | 0.775626000  |
| H  | -1.910858000 | 8.717796000  | 0.075148000  |
| C  | -0.721327000 | 0.081053000  | 6.440246000  |
| H  | -0.539338000 | -0.843918000 | 6.983807000  |
| C  | -1.051026000 | 0.049077000  | 5.093523000  |
| H  | -1.126052000 | -0.901869000 | 4.565719000  |
| Pt | -4.252846000 | 4.223372000  | 4.313166000  |
| S  | -1.198289000 | 5.602953000  | 5.513529000  |
| S  | -4.133468000 | 0.898319000  | 7.321163000  |

|   |              |              |              |
|---|--------------|--------------|--------------|
| N | -4.242238000 | 3.165847000  | 6.099541000  |
| N | -3.818074000 | 6.180387000  | 5.065863000  |
| C | -4.663807000 | 1.382306000  | 4.585860000  |
| C | -4.693598000 | 2.416714000  | 3.614012000  |
| C | -4.368795000 | 1.863913000  | 5.907143000  |
| C | -3.846765000 | 2.342125000  | 8.245338000  |
| C | -4.871591000 | 7.018109000  | 5.089785000  |
| H | -5.791130000 | 6.611967000  | 4.672790000  |
| C | -3.960536000 | 3.479456000  | 7.415220000  |
| C | -3.803682000 | 4.750998000  | 7.977927000  |
| H | -3.926363000 | 5.634187000  | 7.363716000  |
| C | -3.543314000 | 2.446443000  | 9.602048000  |
| H | -3.452015000 | 1.557434000  | 10.223095000 |
| C | -4.814514000 | 8.294542000  | 5.614990000  |
| H | -5.701602000 | 8.922218000  | 5.620323000  |
| C | -2.614258000 | 6.604940000  | 5.511617000  |
| C | -2.491402000 | 7.900725000  | 6.062654000  |
| H | -1.512266000 | 8.217153000  | 6.414563000  |
| C | -3.501593000 | 4.855962000  | 9.328244000  |
| H | -3.371132000 | 5.843870000  | 9.766068000  |
| C | -4.974329000 | 2.021355000  | 2.296458000  |
| H | -4.984687000 | 2.767826000  | 1.503922000  |
| C | -5.222317000 | 0.687158000  | 1.979149000  |
| H | -5.438585000 | 0.419098000  | 0.944887000  |
| C | -3.362726000 | 3.717063000  | 10.135560000 |
| H | -3.120974000 | 3.827205000  | 11.191112000 |
| C | -3.587156000 | 8.737439000  | 6.125727000  |
| H | -3.489426000 | 9.736171000  | 6.549313000  |
| C | -5.185023000 | -0.312911000 | 2.958602000  |
| H | -5.371553000 | -1.352045000 | 2.693732000  |
| C | -4.897044000 | 0.036924000  | 4.269346000  |
| H | -4.854587000 | -0.725644000 | 5.048000000  |
